# Supplementary material
Source: publisher figshare collection journal article supplement (https://tandf.figshare.com/ndownloader/files/30718025)
Supplement: Supplementary file 1 [file 30718025]

**Supporting Information**

**Estrogenic and Anti-Inflammatory Phenanthrenes from *Juncus effusus* L.**

**Hao-Chun Hu1,2,+, Yi-Hong Tsai1,+ , Yu-Che Chuang1, Kuei-Hung Lai3, Yu-Ming Hsu4,5, Tsong-Long Hwang6,7,8, Chih-Chan Lin9,** **Ferenc Fülöp2,10, Yang-Chang Wu11,12, Szu-Yin Yu4, Yu-Ting Kuo13,14,15,*, Fang-Rong Chang1,16,17,18,***

1. Graduate Institute of Natural Products, College of Pharmacy, Kaohsiung Medical University, Kaohsiung, Taiwan.
2. Institute of Pharmaceutical Chemistry, University of Szeged, Szeged, Hungary
3. Graduate Institute of Pharmacognosy, College of Pharmacy, Taipei Medical University, Taipei, Taiwan.
4. Research Center for Environmental Medicine, Kaohsiung Medical University, Kaohsiung, Taiwan.
5. Department of Biological Science & Technology, Meiho University, Pingtung, Taiwan.
6. Department of Medical Research, Chi-Mei Medical Center, Tainan, Taiwan.
7. Graduate Institute of Natural Products, College of Medicine, Chang Gung University, Taoyuan, Taiwan.
8. Research Center for Chinese Herbal Medicine, Research Center for Food and Cosmetic Safety, and Graduate Institute of Health Industry Technology, College of Human Ecology, Chang Gung University of Science and Technology, Taoyuan, Taiwan.
9. Department of Anesthesiology, Chang Gung Memorial Hospital, Taoyuan, Taiwan.
10. MTA-SZTE Stereochemistry Research Group, Hungarian Academy of Sciences, Szeged, Hungary.
11. Graduate Institute of Integrated Medicine, China Medical University, Taichung, Taiwan.
12. Chinese Medicine Research and Development Center, China Medical University Hospital, Taichung, Taiwan.
13. Department of Medical Imaging, Chi Mei Medical Center, Tainan, Taiwan.
14. Department of Medical Imaging, Kaohsiung Medical University Hospital, Kaohsiung, Taiwan.
15. Department of Radiology, Faculty of Medicine, College of Medicine, Kaohsiung Medical University, Kaohsiung, Taiwan.
16. Drug Development and Value Creation Research Center, Kaohsiung Medical University, Kaohsiung, Taiwan.
17. Department of Medical Research, Kaohsiung Medical University Hospital, Kaohsiung Medical University, Kaohsiung, Taiwan.
18. Department of Marine Biotechnology and Resources, National Sun Yat-sen University, Kaohsiung 804, Taiwan

+ H.-C.H. and Y.-H.-T. contributed equally to this work.

**Abstract:** *Juncus effusus* L. (*J. effusus*) is a Traditional Chinese Medicine (TCM) that has long been used for dealing with gynecological disorders, such as relieving insomnia, preventing tinnitus, reducing edema with diuretic effect. In our course of evidence-based medical research focused on this herb, one new phenanthrene, Junfusol B (**2**), together with seventeen known compounds were isolated and identified. The isolates were evaluated for their estrogenic and anti-inflammatory activities which were considered as relevant etiological factors of insomnia, tinnitus and edema in the ancient TCM theory. This is the first report to declare the exact estrogen-regulating potential among this type of compounds from *J. effusus*. Moreover, phenanthrenes **3**−**7** exhibited significant inhibitions on superoxide anion generation and elastase release in fMLP/CB-induced human neutrophilic inflammation model. It may be developed to utilize in menopausal multiple syndromes.

Keywords: *Juncus effusus* L., estrogenic, anti-inflammatory

Contents

Fig S1. Stem marrow of *Juncus effusus*.**4**

Fig S2. 1H NMR (CD3OD, 400 MHz) of **1**.**4**

Fig S3. 13C NMR (CD3OD, 100 MHz) of **1**..**5**

Fig S4. HMQC spectrum of **15**

Fig S5. COSY spectrum of **16**

Fig S6. HMBC spectrum of **1**.**6**

Fig S7. NOESY spectrum of **17**

Fig S8. HRESI-MS spectrum of **17**

Fig S9. IR spectrum of **18**

Fig S10. Calculated and experiment ECD spectra of **1**.**8**

Fig S11. 1H NMR (CD3OD, 400 MHz) of **29**

Fig S12. 13C NMR (CD3OD, 100 MHz) of **2**..**9**

Fig S13. HMQC spectrum of **210**

Fig S14. COSY spectrum of **210**

Fig S15. HMBC spectrum of **2**.**11**

Fig S16. NOESY spectrum of **211**

Fig S17. HRESI-MS spectrum of **212**

Fig S18. IR spectrum of **2** **12**

Fig S19. 2D NMR spectra of **1** and **2**.**13**

Fig S20. Binding activity to estrogen-receptor alpha (ERα).**13**

Fig S21. The IC50 of anti-inflammatory assay of **3**–**6**, **8**–**10**, **14**&**15**, and **16**&**1714**

Table S1.1H and 13C NMR spectroscopic data of compounds **1** and **2**.**15**

Table S2. Exp. and cal. OR results of **1** and **2**. **16**

Table S3. ERα binding activity and MTT assay of **3**–**5**, **8**–**13**, and **16**&**1717**

Table S4. Anti-inflammatory assay of **3**–**6**, **8**–**10**, **14**&**15**, and **16**&**17**.**19**

Table S5. SAR of anti-inflammatory assay of tested compounds.**19**

Table S6.Molecular docking data of estradiol and isolates to ERα.**20**

Table S7. 2D diagram of LibDock and CDOCKER docking results**22**

Fig S1. Stem marrow of *Juncus effusus*.


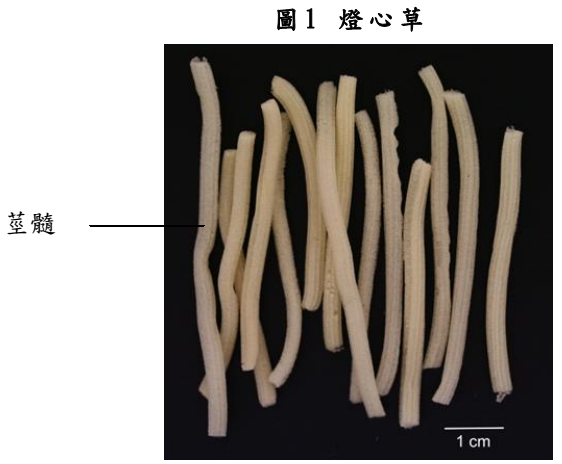


Fig S2. 1H NMR (CD3OD, 400 MHz) of **1**.

Fig S3. 13C NMR (CD3OD, 100 MHz) of **1**.

Fig S4. HMQC spectrum of **1**.

Fig S5. COSY spectrum of **1**.

Fig S6. HMBC spectrum of **1**.

Fig S7. NOESY spectrum of **1**.

Fig S8. HRESI-MS spectrum of **1**.

**
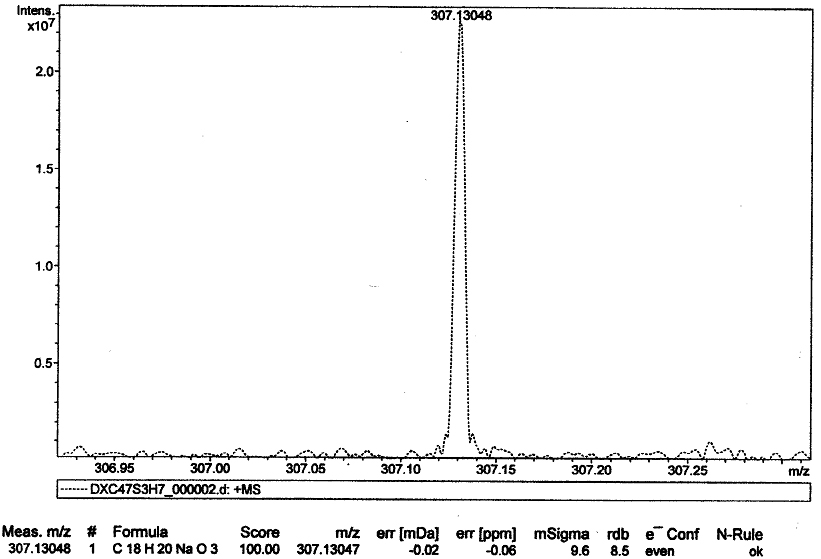
**

Fig S9. IR spectrum of **1**.
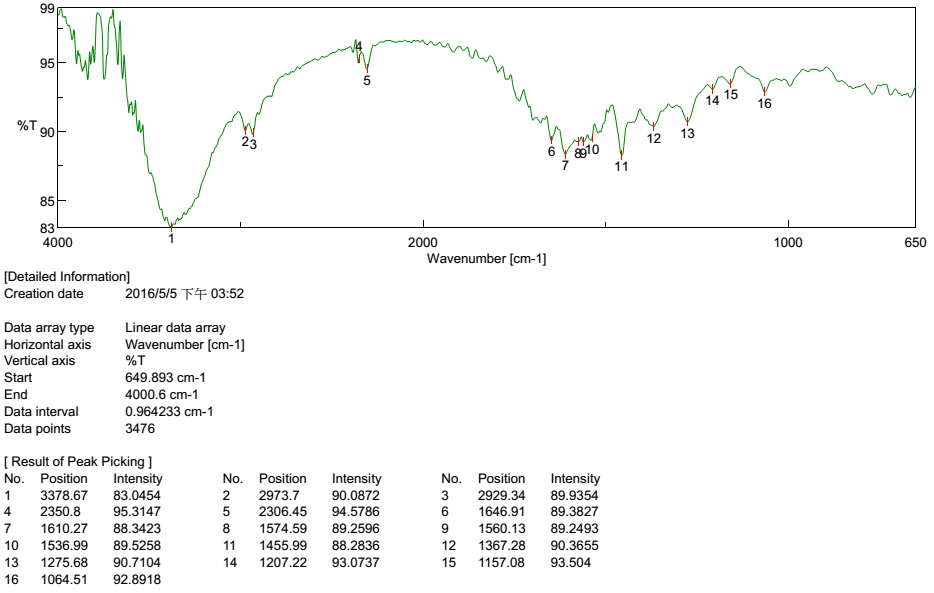


Fig S10. Calculated and experiment ECD spectra of **1**.


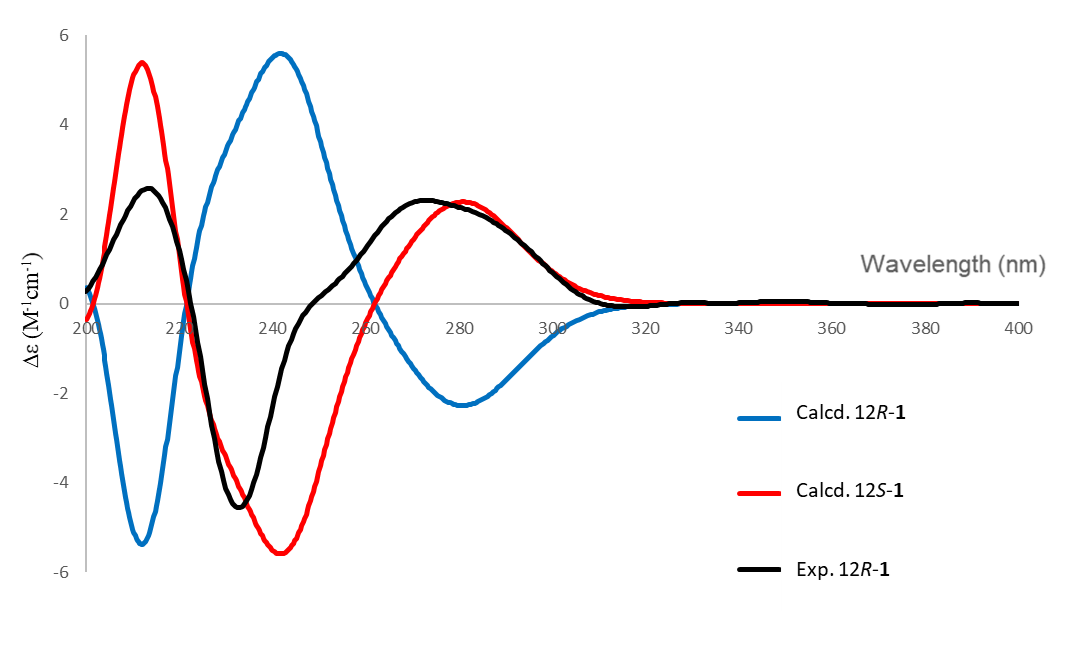


Fig S11. 1H NMR (CD3OD, 400 MHz) of **2**.

Fig S12. 13C NMR (CD3OD, 100 MHz) of **2**.Fig S13. HMQC spectrum of **2**.

Fig S14. COSY spectrum of **2**.

Fig S15. HMBC spectrum of **2**.

Fig S16. NOESY spectrum of **2**.

Fig S17. HRESI-MS spectrum of **2**.

Fig S18. IR spectrum of **2**.


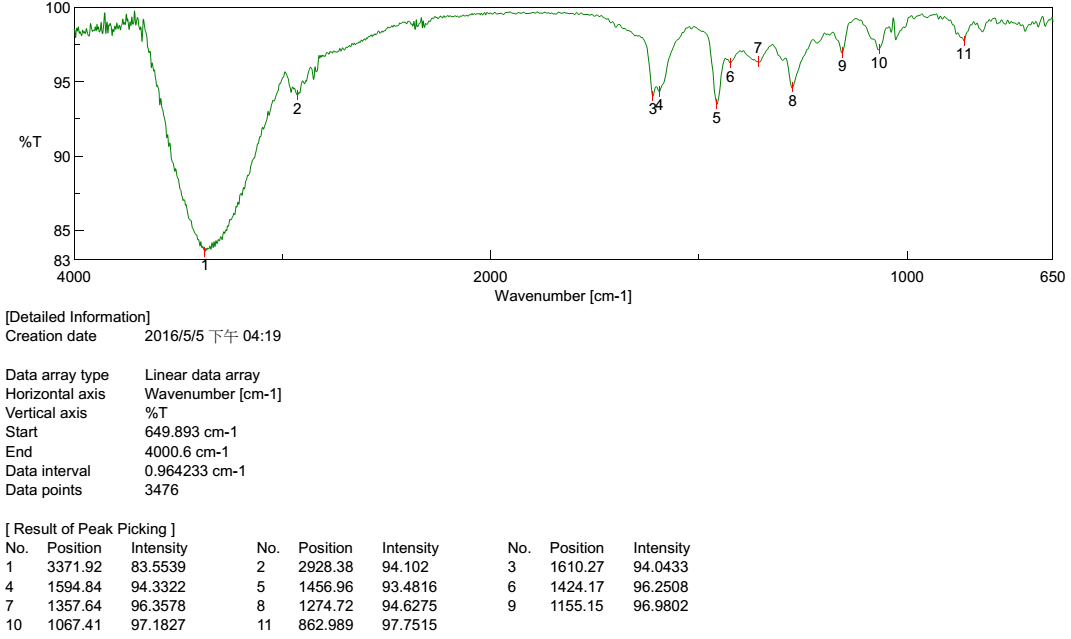


Fig S19. 2D NMR spectra of **1** and **2**

Fig S20. Binding activity to estrogen-receptor alpha (ERα). (**a**) The SEAP/MTT% was calculated to avoid false results from cytotoxicity; (**b**) The SEAP% of ERα activity and the MTT% of MCF-7 cells were presented in percentage, respectively. (n = 3)


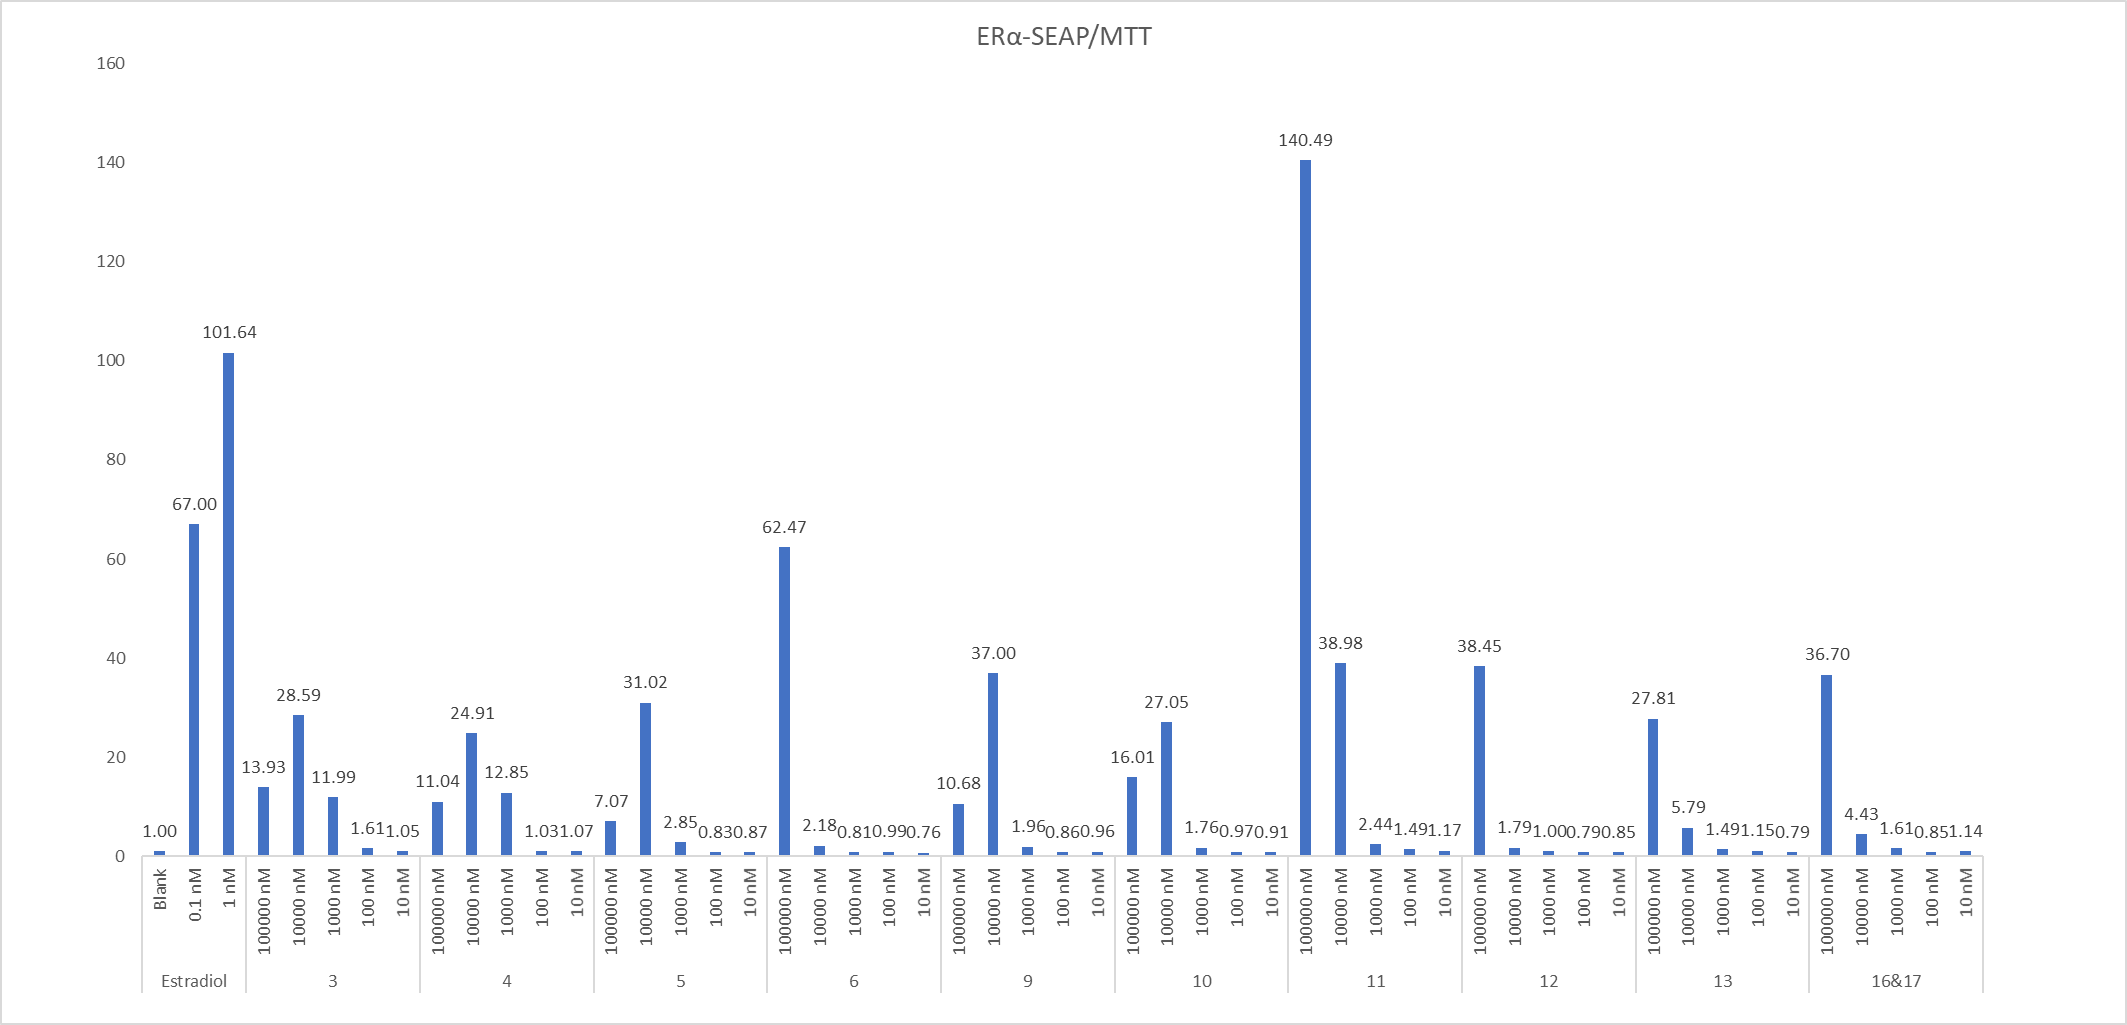


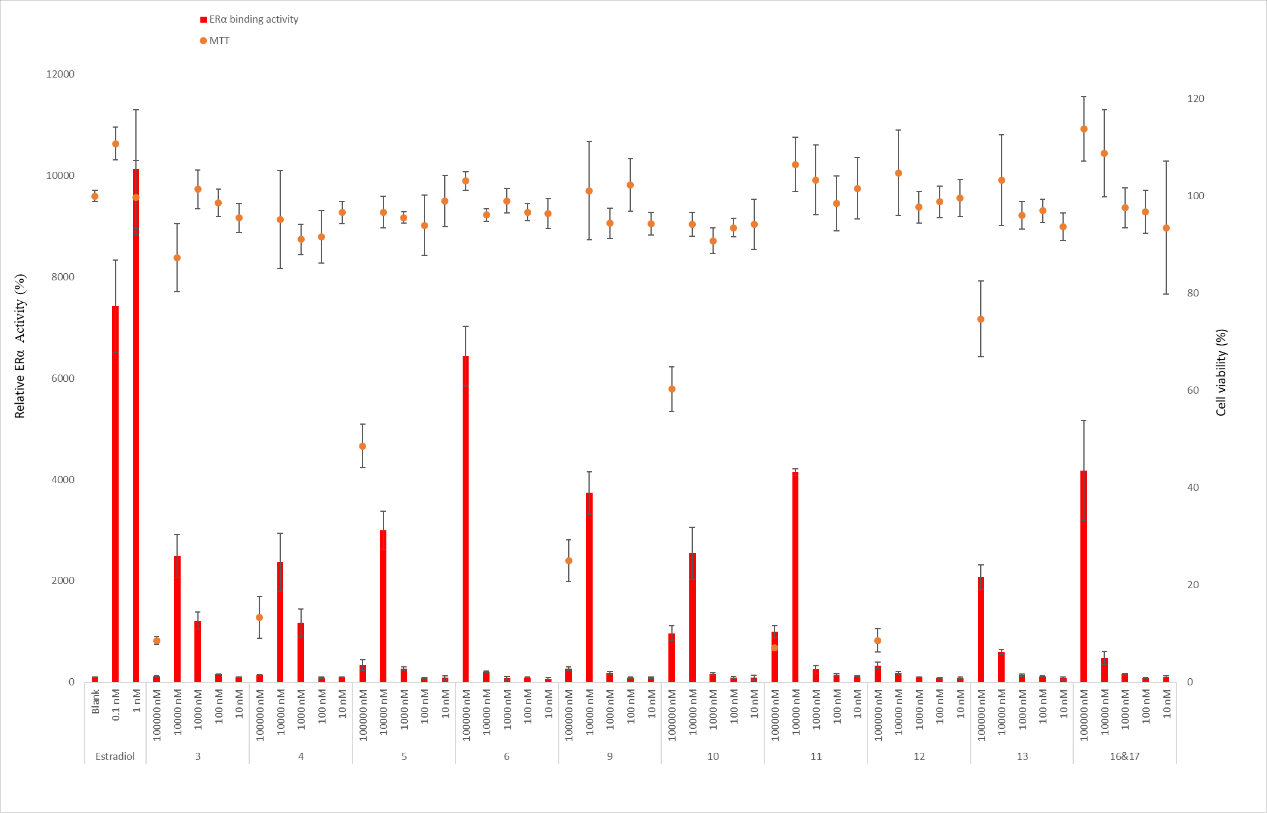


b

Fig S21. The IC50 of anti-inflammatory assay of **3**–**6**, **8**–**10**, **14**&**15**, and **16**&**17**.

| **Table S1.** 1H and 13C NMR spectroscopic data of compounds **1** and **2**. | | | | |
| --- | --- | --- | --- | --- |
| **Position** | **1** | | **2** | |
|  | *δ*H (mult, *J* in Hz)a | *δ*C, typeb | *δ*H (mult, *J* in Hz)a | *δ*C, typeb |
| 1 |  | 122.3, C |  | 120.6, C |
| 2 |  | 155.1, C |  | 153.7, C |
| 3 | 6.69, d (8.4) | 112.5, CH | 6.67, d (8.3) | 111.3, CH |
| 4 | 6.93, d (8.4) | 127.1, CH | 7.22, d (8.3) | 126.0, CH |
| 5 |  | 141.8, C |  | 138.6, C |
| 6 | 6.86, d (2.7) | 112.4, CH | 6.87, d (2.5) | 112.2, CH |
| 7 |  | 156.9, C |  | 155.1, C |
| 8 | 6.64, d (2.7) | 114.7, CH | 6.61, d (2.5) | 113.4, CH |
| 9 | 2.88, dt (14.2, 4.2)  2.42, td (13.6, 3.9) | 26.9, CH2 | 2.62, m | 30.7, CH2 |
| 10 | 2.68, dt (14.2, 4.2)  2.53, td (13.6, 3.9) | 32.0, CH2 | 2.58, m | 25.5, CH2 |
| 11 | 2.21, s | 12.0, CH3 | 2.18, s | 10.5, CH3 |
| 12 | 4.87, m | 76.5, CH | 5.20, dd (8.4, 4.1) | 70.8, CH |
| 13 | 1.58, d (6.3) | 23.3, CH3 | 3.74, dd (11.5, 8.0)  3.69, dd (11.5, 4.1) | 67.1, CH2 |
| 1a |  | 140.8, C |  | 139.3, C |
| 4a |  | 126.8, C |  | 125.6, C |
| 5a |  | 129.0, C |  | 127.1, C |
| 8a |  | 141.9, C |  | 140.6, C |
| OMe | 2.93, s | 55.9, CH3 |  |  |
|  | a Measured at 400 MHz, *J* value in Hz (CD3OD) b Measured at 100 MHz (CD3OD) | | | |

| **Table S2.** Exp. and cal. OR results of **1** and **2**. | | |
| --- | --- | --- |
|  | cal. value a | exp. value b |
| **1** |  | -36 |
| cal. **1**-*R* | 134 |  |
| cal. **1**-*S* | -92 |  |
| **2** |  | -50 |
| cal. **2**-*R* | -57 |  |
| cal. **2**-*S* | 56 |  |
| a :solvent phase in MeOH; b: (*c* 1.0, MeOH) | | |

| **Table S3.** **ERα binding activity and MTT assay of 3**–**5, 8**–**13, and 16&17** | | | | | |
| --- | --- | --- | --- | --- | --- |
| Sample (nM) | | ERα binding activity | | MTT | |
| Mean% | SD% | Mean% | SD% |
| Estradiol  (Control) | Blank | 100 | 7.8 | 100 | 1.2 |
| 0.1 | 7423.4 | 911.5 | 110.8 | 3.4 |
| 1.0 | 10133.3 | 1175.6 | 99.7 | 7.6 |
| **3** | 100,000 | 119.8 | 11.8 | 8.6 | 0.8 |
| 10,000 | 2495.5 | 425.3 | 87.3 | 7.0 |
| 1,000 | 1215.4 | 174.8 | 101.4 | 4.0 |
| 100 | 158.4 | 2.3 | 98.6 | 2.8 |
| 10 | 100.7 | 2.8 | 95.5 | 3.0 |
| **4** | 100,000 | 146.8 | 7.6 | 13.3 | 4.3 |
| 10,000 | 2371.2 | 575.9 | 95.2 | 10.1 |
| 1,000 | 1170.6 | 280.6 | 91.1 | 3.1 |
| 100 | 94.7 | 10.6 | 91.6 | 5.4 |
| 10 | 103.3 | 2.6 | 96.6 | 2.3 |
| **5** | 100,000 | 343.4 | 105.4 | 48.6 | 4.5 |
| 10,000 | 3000.0 | 373.0 | 96.7 | 3.3 |
| 1,000 | 272.3 | 34.1 | 95.6 | 1.2 |
| 100 | 77.9 | 8.0 | 94.0 | 6.2 |
| 10 | 85.7 | 38.7 | 99.0 | 5.3 |
| **6** | 100,000 | 6440.5 | 593.4 | 103.1 | 1.9 |
|  | 10,000 | 209.9 | 15.3 | 96.1 | 1.3 |
|  | 1,000 | 80.4 | 32.6 | 99.0 | 2.5 |
|  | 100 | 95.5 | 5.8 | 96.7 | 1.8 |
|  | 10 | 73.2 | 15.6 | 96.4 | 3.1 |
| **9** | 100,000 | 266.9 | 35.8 | 25.0 | 4.3 |
| 10,000 | 3740.5 | 418.8 | 101.1 | 10.1 |
| 1,000 | 185.4 | 18.7 | 94.4 | 3.1 |
| 100 | 88.3 | 14.2 | 102.3 | 5.4 |
| 10 | 90.9 | 14.0 | 94.3 | 2.3 |
| **10** | 100,000 | 965.5 | 147.5 | 60.3 | 4.6 |
| 10,000 | 2547.7 | 511.2 | 94.2 | 2.5 |
| 1,000 | 159.8 | 24.0 | 90.8 | 2.6 |
| 100 | 90.9 | 25.9 | 93.5 | 1.9 |
| 10 | 85.9 | 47.3 | 94.2 | 5.2 |
| **11** | 100,000 | 997.5 | 112.8 | 7.1 | 0.4 |
| 10,000 | 4151.4 | 64.9 | 106.5 | 5.6 |
| 1,000 | 252.4 | 73.6 | 103.3 | 7.2 |
| 100 | 146.6 | 21.7 | 98.5 | 5.6 |
| 10 | 118.8 | 10.7 | 101.6 | 6.3 |
| **12** | 100,000 | 330.7 | 64.6 | 8.6 | 2.4 |
| 10,000 | 187.5 | 23.0 | 104.8 | 8.8 |
| 1,000 | 98.1 | 5.9 | 97.7 | 3.2 |
| 100 | 78.4 | 8.0 | 98.8 | 3.2 |
| 10 | 84.6 | 20.9 | 99.6 | 3.8 |
| **13** | 100,000 | 2077.2 | 240.1 | 74.7 | 7.8 |
| 10,000 | 598.6 | 47.5 | 103.3 | 9.3 |
| 1,000 | 142.6 | 24.4 | 96.0 | 2.8 |
| 100 | 111.7 | 14.0 | 97.0 | 2.4 |
| 10 | 74.3 | 27.4 | 93.7 | 2.8 |
| **16** & **17** | 100,000 | 4176.6 | 986.4 | 113.8 | 6.6 |
| 10,000 | 482.4 | 127.4 | 108.8 | 8.9 |
| 1,000 | 156.8 | 12.9 | 97.6 | 4.1 |
| 100 | 82.5 | 6.3 | 96.8 | 4.4 |
| 10 | 106.7 | 21.3 | 93.5 | 13.7 |

| **Table S4.** Anti-inflammatory assay of **3**–**6**, **8**–**10**, **14&15**, and **16&17** | | |
| --- | --- | --- |
| Sample | Superoxide anion  (IC50 μM) | Elastase release  (IC50 μM) |
| **3** | 9.33 ± 0.12 | 3.65 ± 1.43 |
| **4** | 0.53 ± 0.08 | 1.17 ± 0.42 |
| **5** | 0.90 ± 0.19 | 15.66 ± 4.17 |
| **6** | 5.18 ± 0.60 | 16.29 ± 1.09 |
| **7** | 6.76 ± 1.42 | 18.60 ± 1.81 |
| **9** | E | 2.92 ± 1.36 |
| **10** | E | 4.92 ± 2.16 |
| **14** & **15** | >20 | >20 |
| **16** & **17** | 0.66 ± 0.06 | >20 |
| DPI | 1.11 ± 0.03 |  |
| PMSF |  | 114.18 ± 39.55 |
| E: enhance; NA: No activity;  DPI: diphenyleneiodonium; PMSF: phenylmethylsulfonyl fluoride | | |

| **Table S5. SAR of anti-inflammatory assay of tested compounds** | | | |
| --- | --- | --- | --- |
|  | | | |
| Compared compound | Position | Functional groupa | Efficient (IC50) b |
| **3** and **9** | 9 and 10 | CH2–CH2 to CH=CH | S.A. ↓; E.R. ↑ |
| **5** and **10** |
| **3** and **4** | 8 | R4 = H to CH3 | S.A. ↓; E.R. ↓ |
| **3** and **5** | 6 | R2 = H to CH3 | S.A. ↓; E.R. ↑ |
| **3** and **6** | 7 | R3 = OH to CH2OH | S.A. ↓; E.R. ↑ |
| **3** and **7** | 5 | R1 = C to D | S.A. ↓; E.R. ↑ |
| a: C and D are as shown in fig.1.  b: Superoxide anion: S.A.; Elastase release: E.R. | | | |

| **Table S6.** Molecular docking data of estradiol and isolates to ERα (PDB ID: 1GWR). | | | | | | | |
| --- | --- | --- | --- | --- | --- | --- | --- |
| Compound Name/  Compound Number | LibDOCK | | | CDOCKER | | | |
| LibDock Score | Binding Energy  (Kcal mol-1) | Hydrogen bonds  (Bond Length, Å) | -CDOCKER energy  (Kcal mol-1) | -CDOCKER interaction energy (Kcal mol-1) | Binding Energy  (Kcal mol-1) | Hydrogen bonds  (Bond Length, Å) |
| Estradiol | 100.1840 | -129.5291 | GLU353 (1.82036),  ARG394 (1.77359),  HIS524 (1.98750) | 10.3452 | 48.6230 | -124.3196 | GLU353 (1.92856),  ARG394 (2.00417),  HIS524 (1.93912) |
| **3** | 91.1972 | -106.9669 | **GLU353** (1.86028), GLY521 (1.82383), **HIS524** (3.022) | 17.6234 | 39.9164 | -104.3211 | **GLU353** (1.98005),  GLY521 (1.94269) |
| **4** | 89.7791 | -109.1347 | **GLU353** (2.228),  GLY521 (2.74646) | 14.2672 | 41.2735 | -114.3624 | **GLU353** (2.48703),  GLY521 (1.92031),  **HIS524** (2.51981) |
| **5** | 87.0904 | -125.0480 | **GLU353** (1.80699),  GLY521 (2.60058) | 15.9891 | 40.9493 | -122.2572 | **GLU353** (1.98864),  GLY521 (2.47881) |
| **6** | 97.4145 | -122.7487 | **GLU353** (1.78153),  GLY521 (2.26859),  **HIS524** (1.7862) | 19.2796 | 44.0920 | -120.7049 | **GLU353** (1.84863),  GLY521 (1.93822),  **HIS524** (2.21591) |
| **9** | 88.1410 | -129.8878 | **GLU353** (2.45759),  GLY521 (2.67499) | 4.76425 | 38.5726 | -109.9942 | **GLU353** (1.98756),  GLY521 (1.96616) |
| **10** | 85.7564 | -102.5517 | **GLU353** (2.0232),  GLY521 (2.54168) | 3.01393 | 38.5469 | -124.0593 | **GLU353** (1.99966),  GLY521 (2.617630) |
| **11** | 91.5866 | -132.5726 | **GLU353** (1.85664),  GLY521 (1.96075),  **HIS524** (2.64181) | 6.39082 | 38.4256 | -133.0090 | **GLU353** (2.03377),  GLY521 (2.12113),  **HIS524** (2.38209) |
| **12** | 86.8597 | -108.7197 | **GLU353** (1.83725),  GLY521 (2.02939) | 11.6519 | 34.4494 | -120.2102 | **GLU353** (2.03429),  GLY521 (2.51886) |
| **13** | 89.1533 | -117.05809 | **GLU353** (1.90386),  GLY521 (2.52703) | -1.70626 | 34.694 | -109.7507 | **GLU353** (2.09211),  GLY521 (2.50337) |

| Table S7. 2D diagram of LibDock and CDOCKER docking results. | | |
| --- | --- | --- |
|  | LibDOCK | CDOCKER |
| Estradiol | 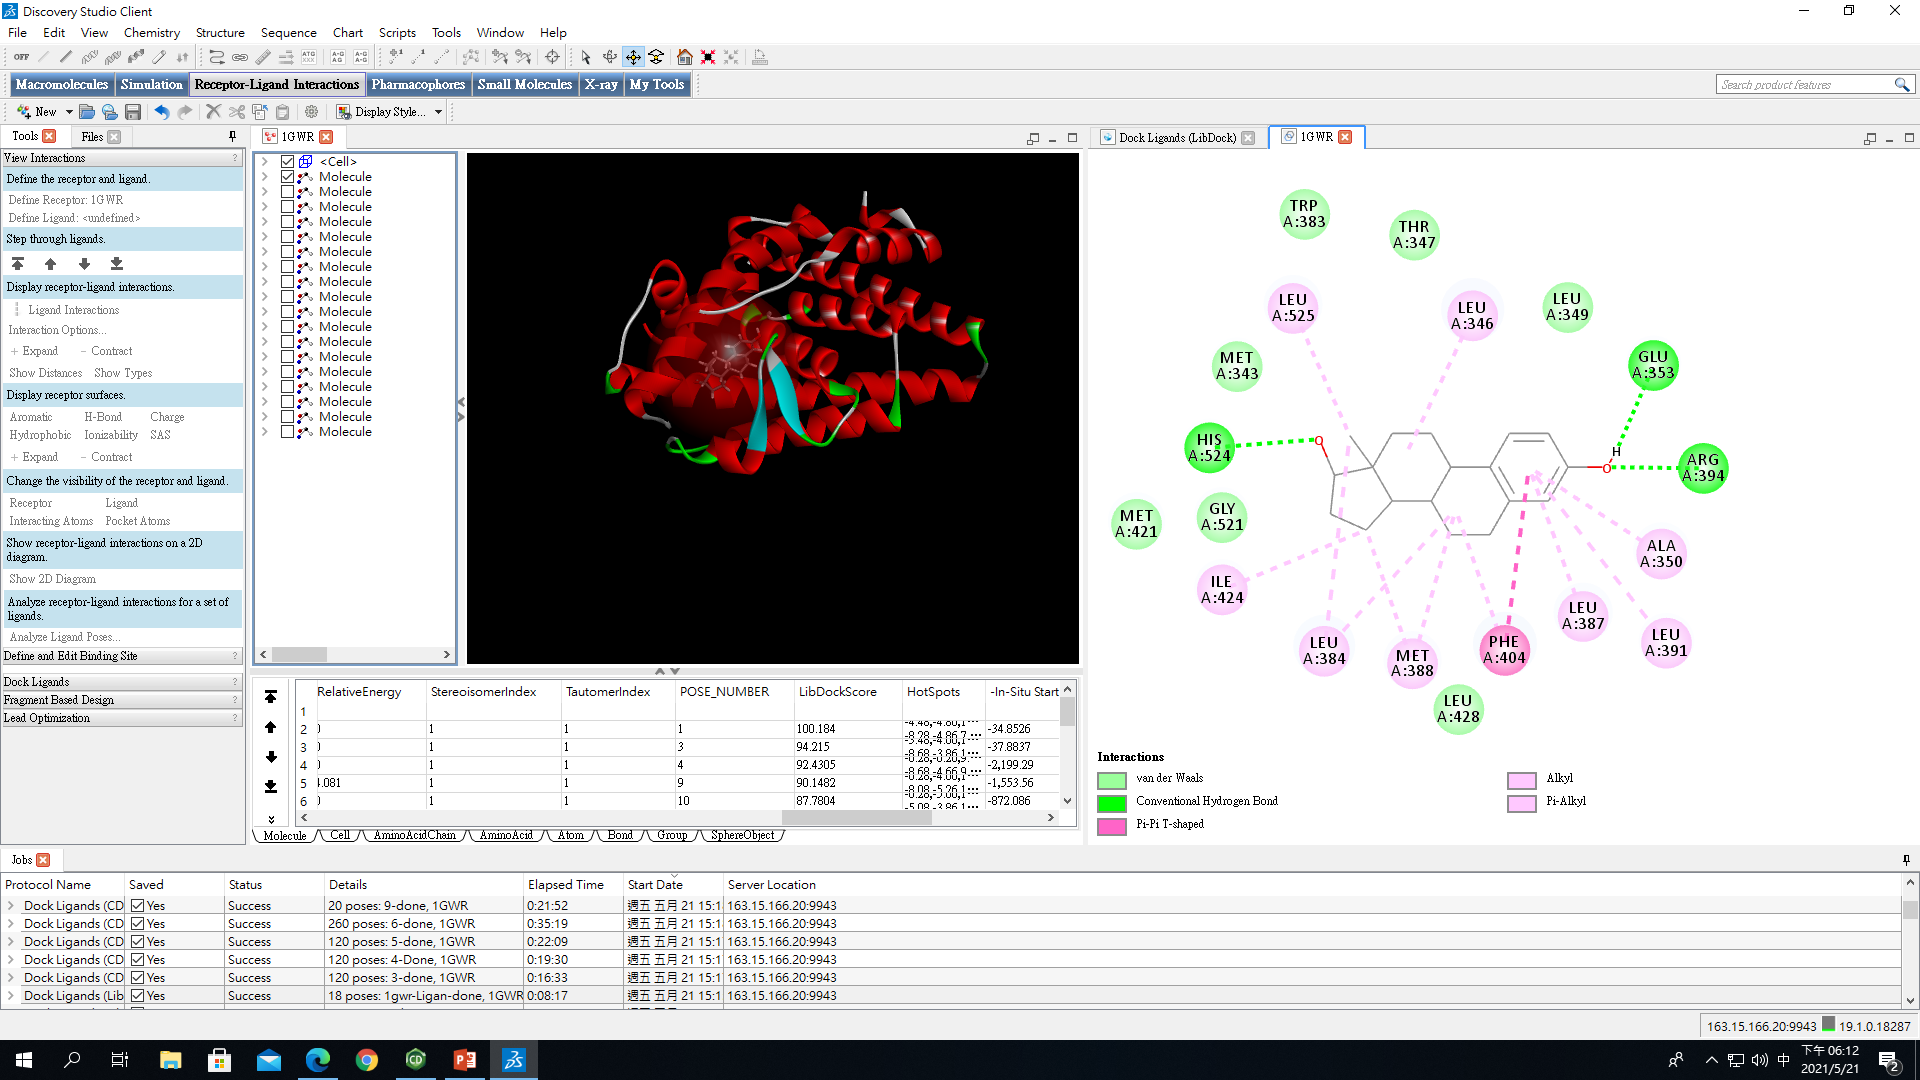 | 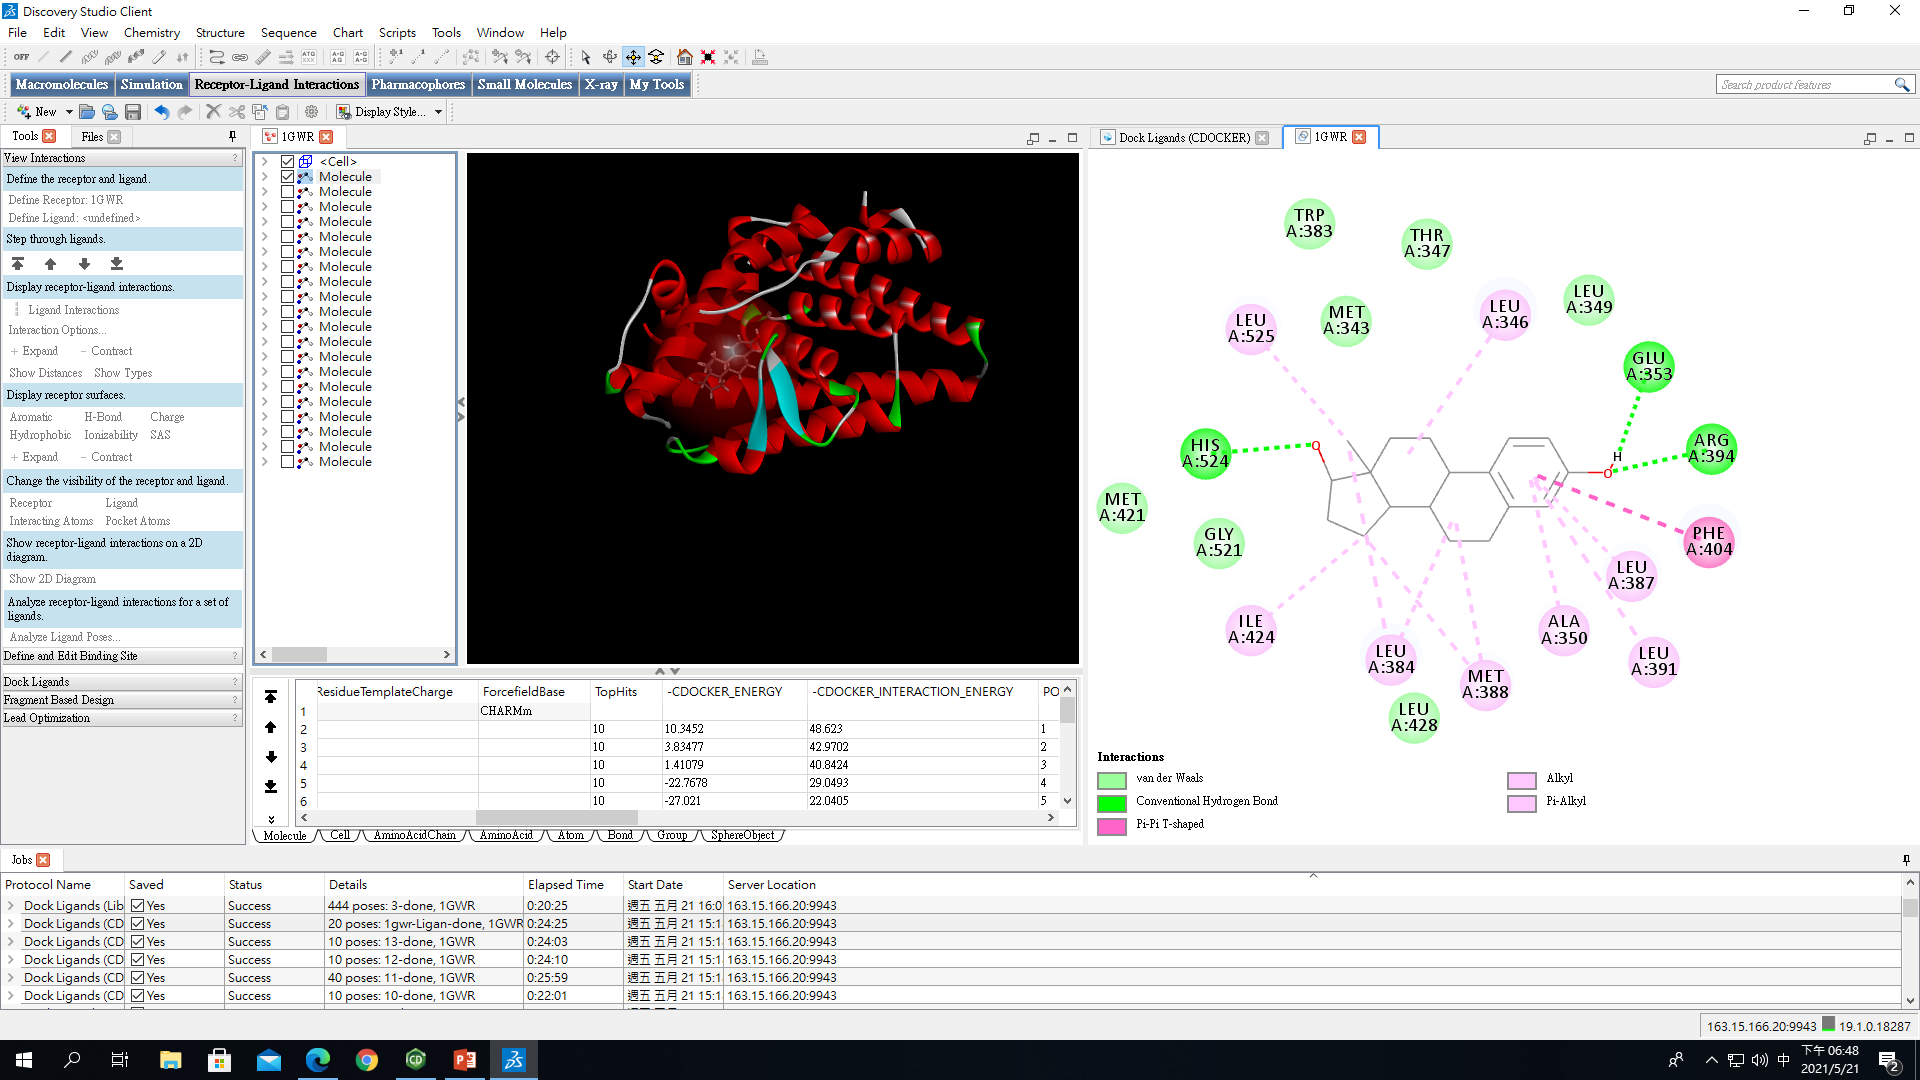 |
| **3** | 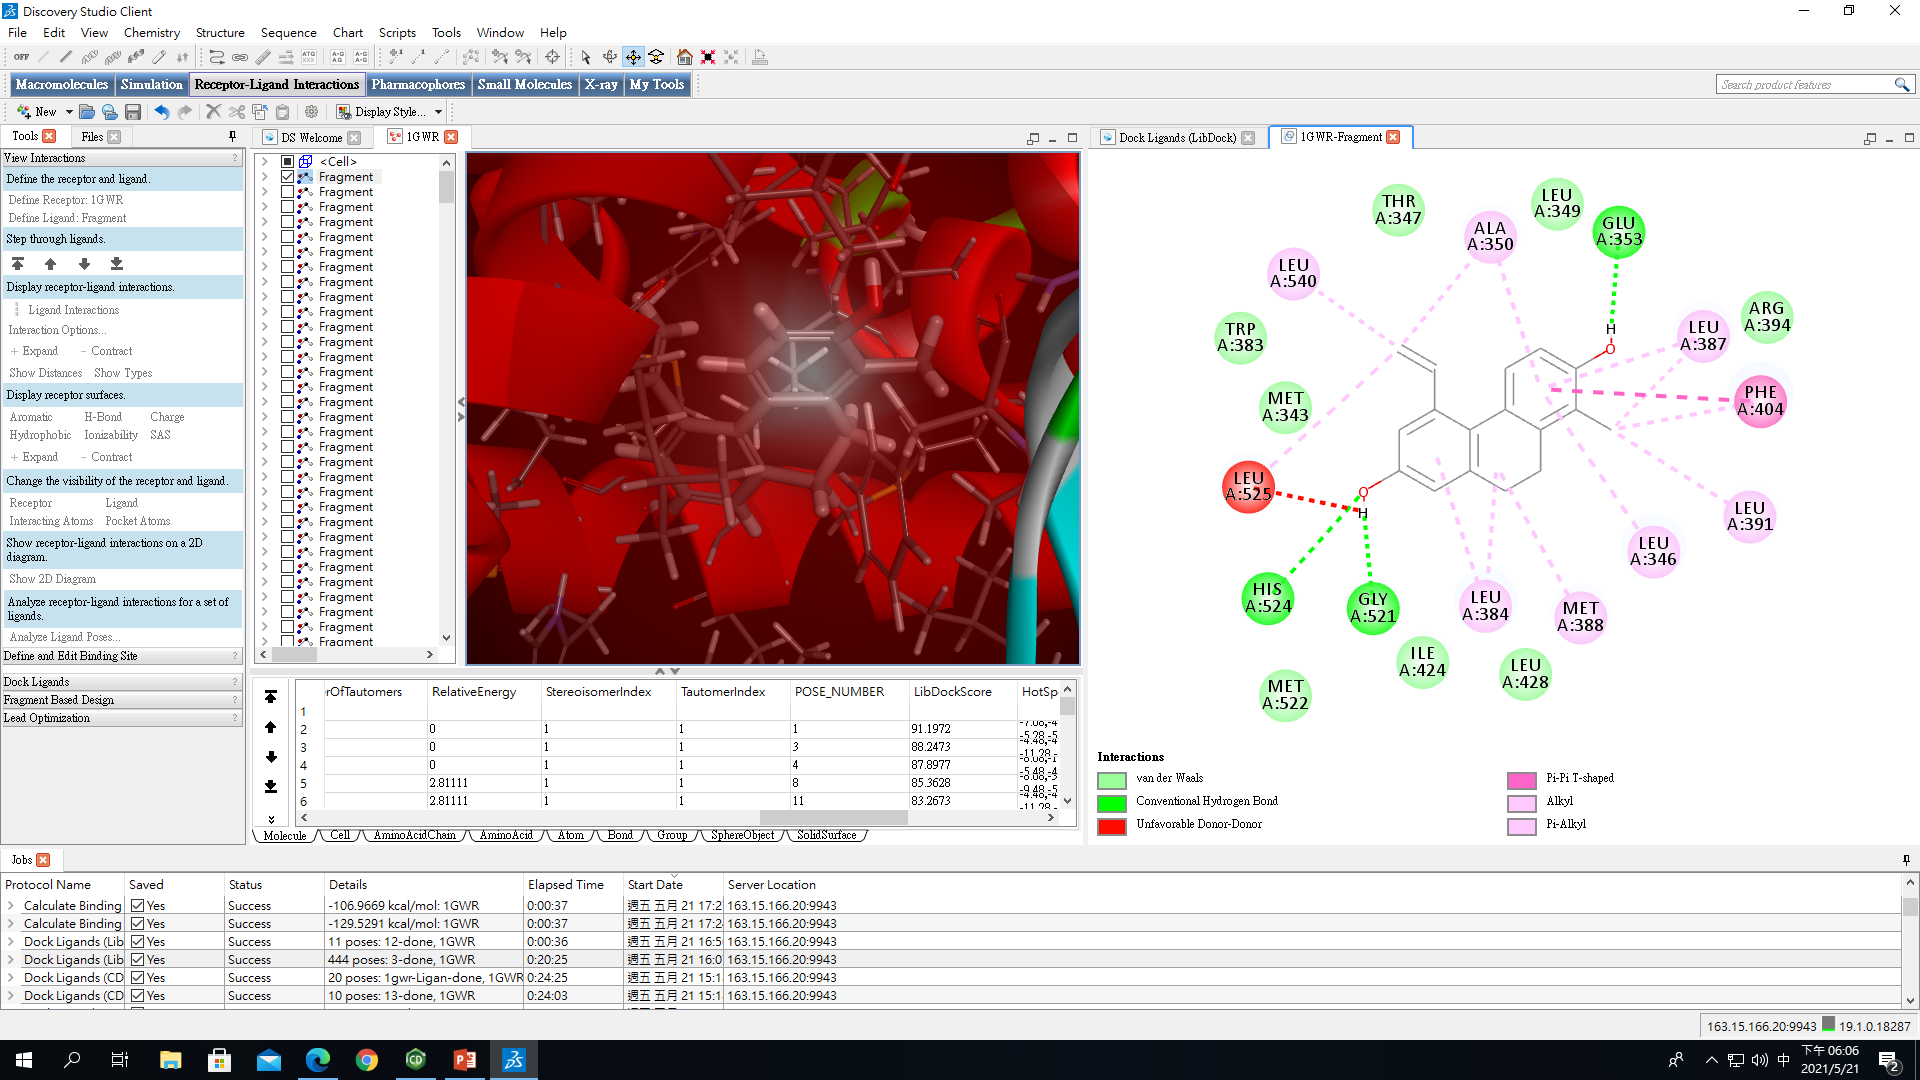 | 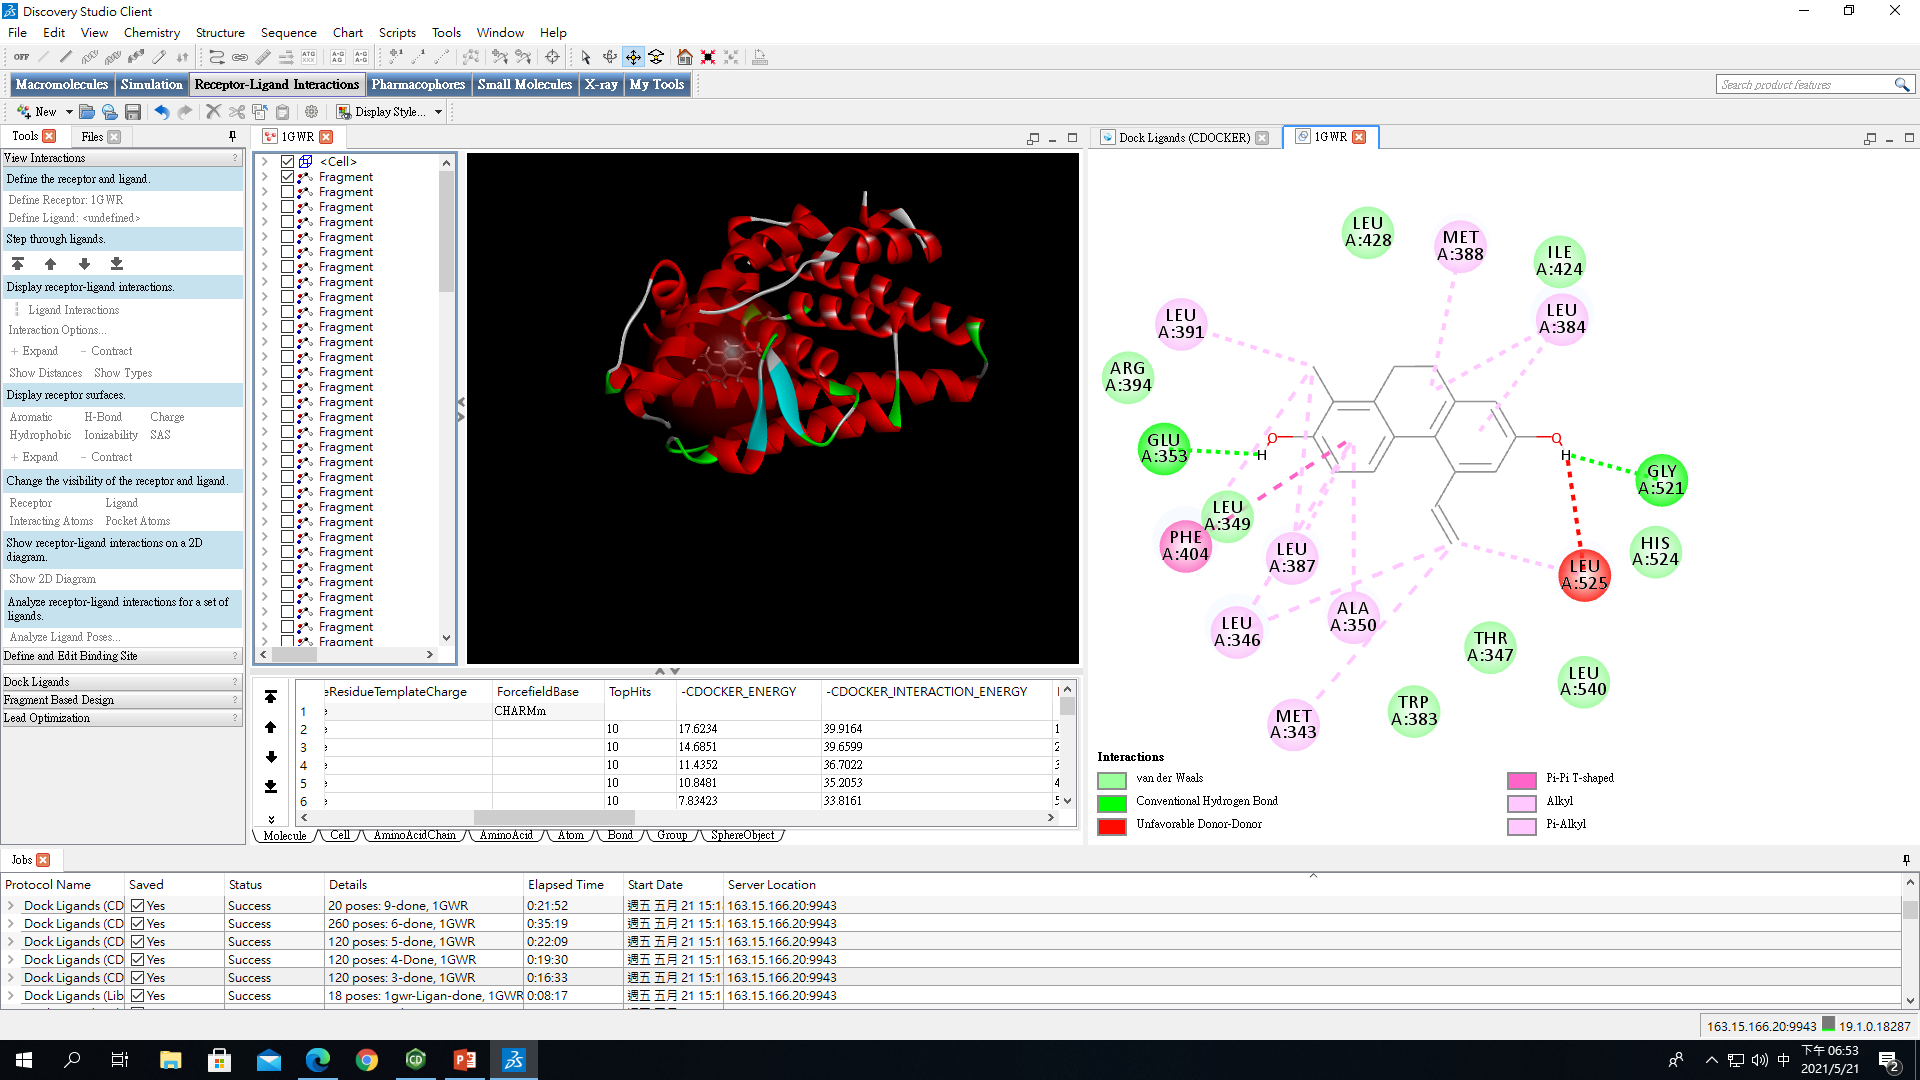 |
| **4** | 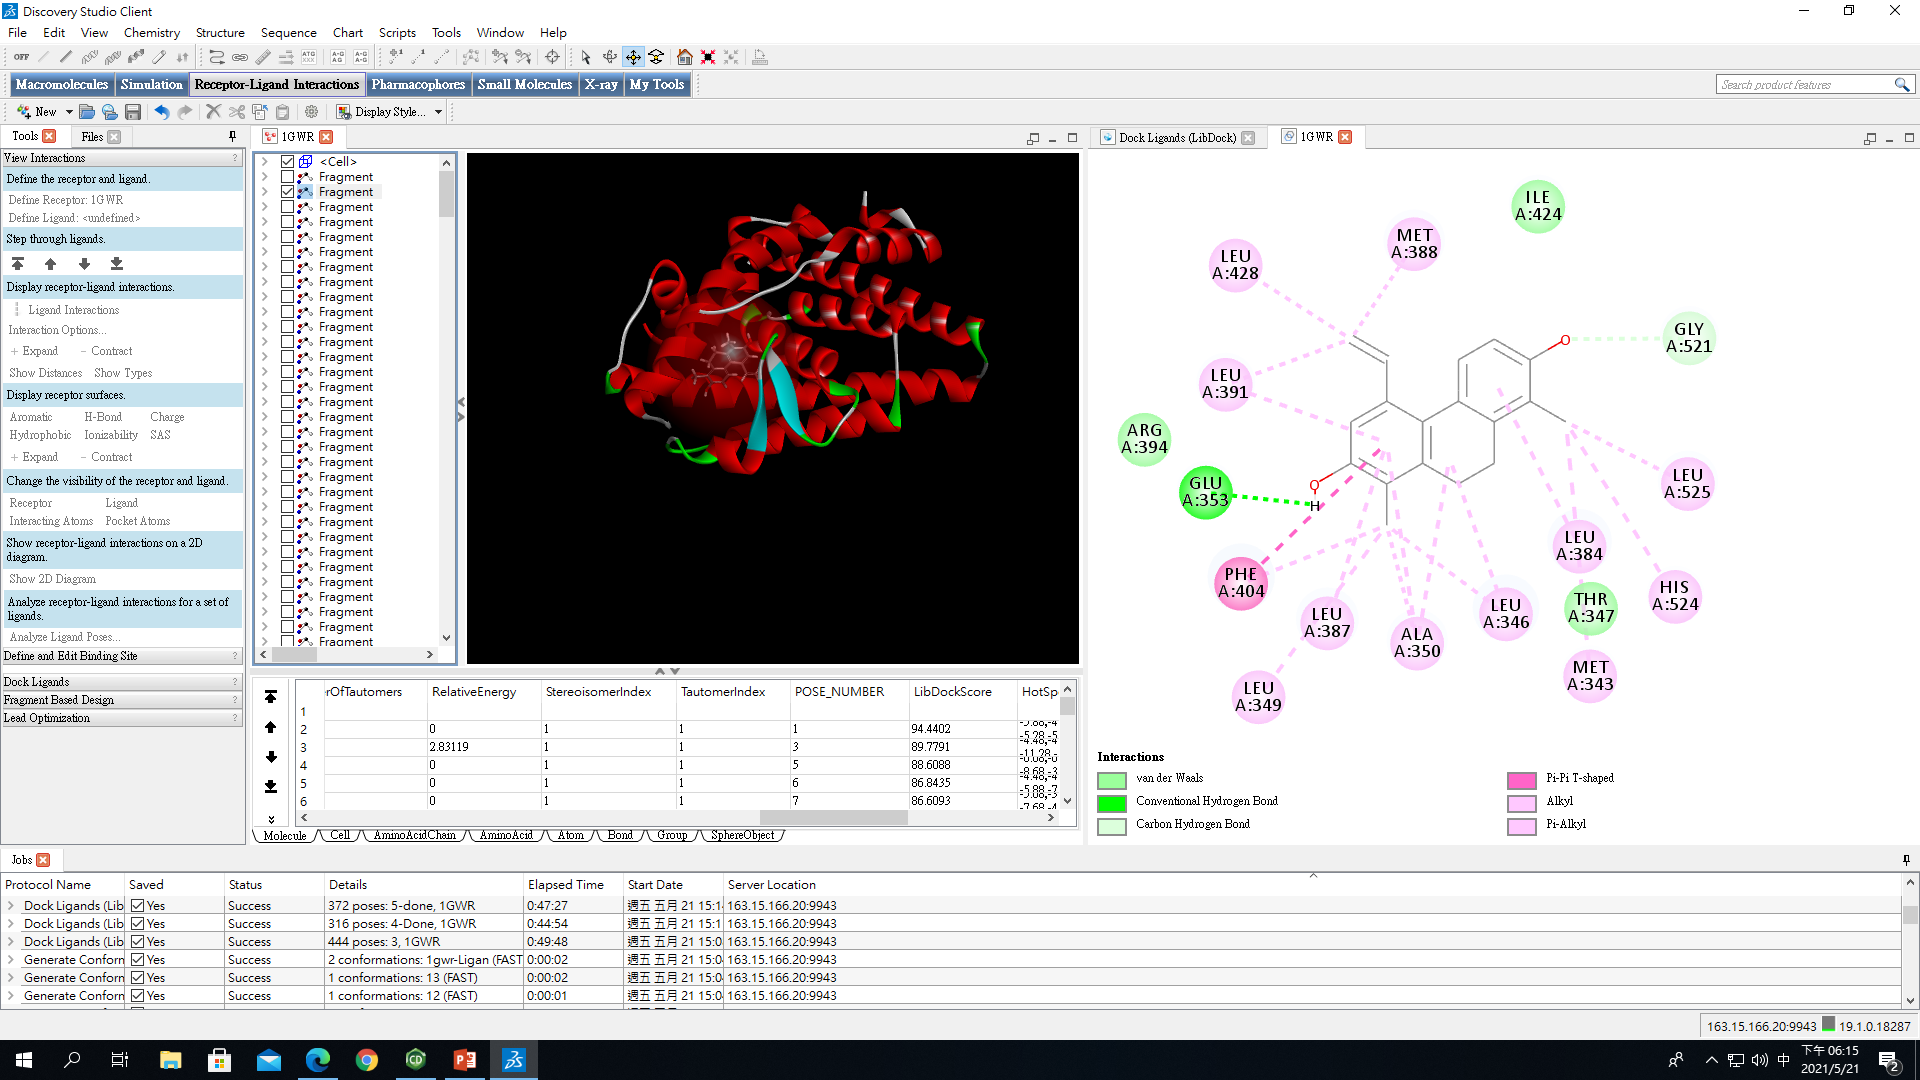 | 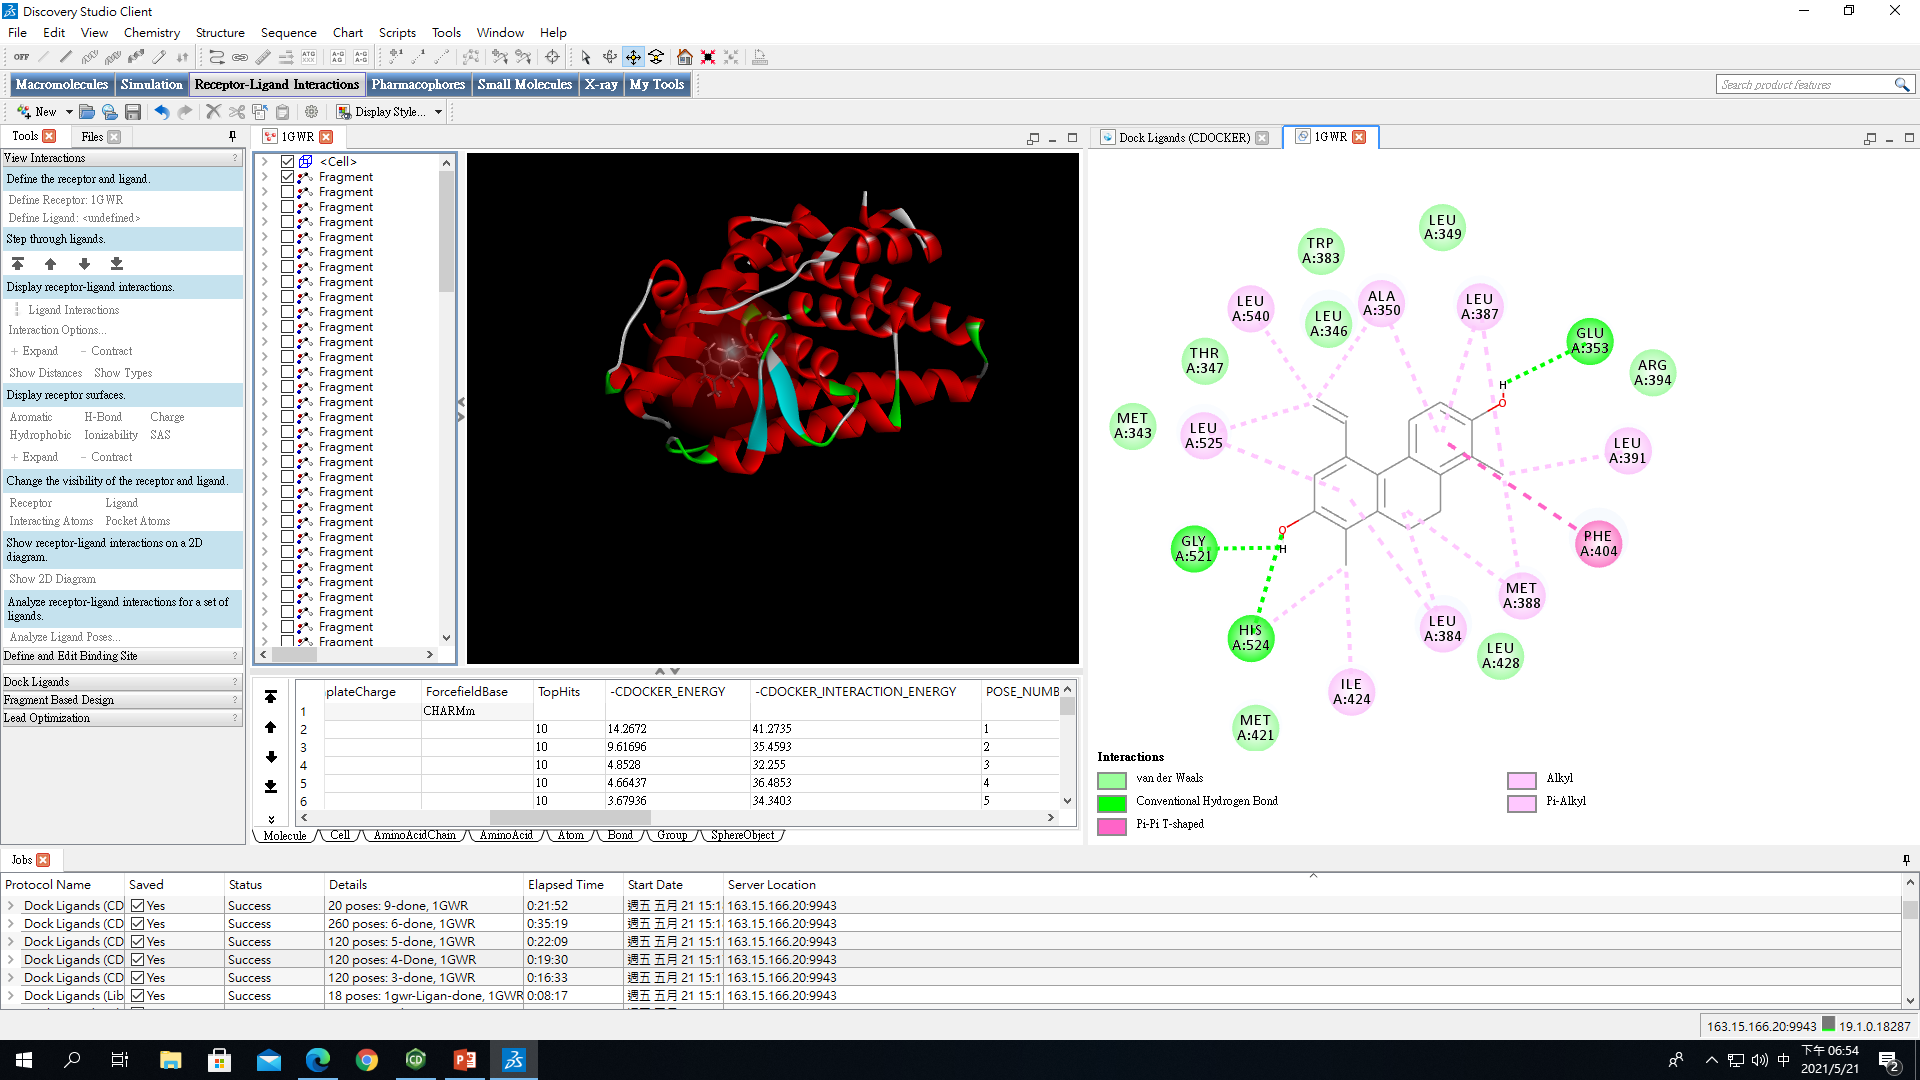 |
| **5** | 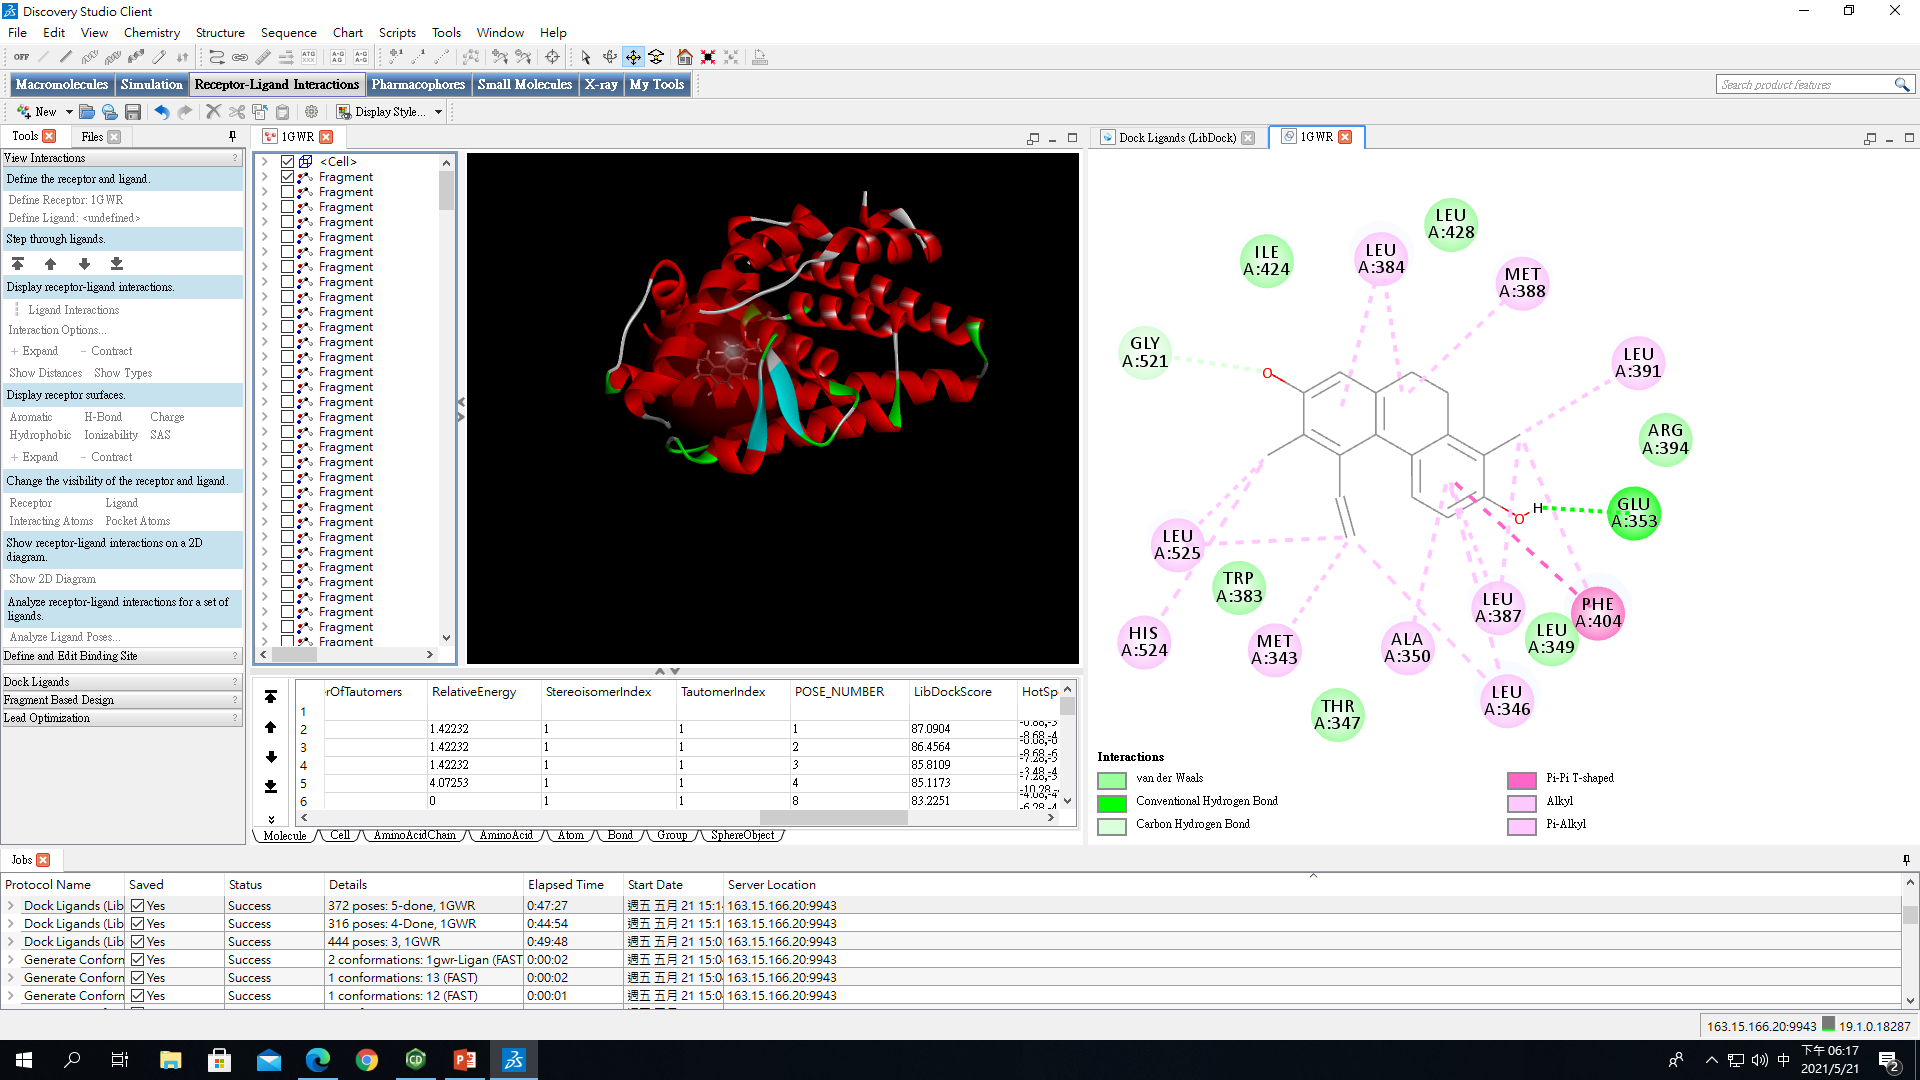 | 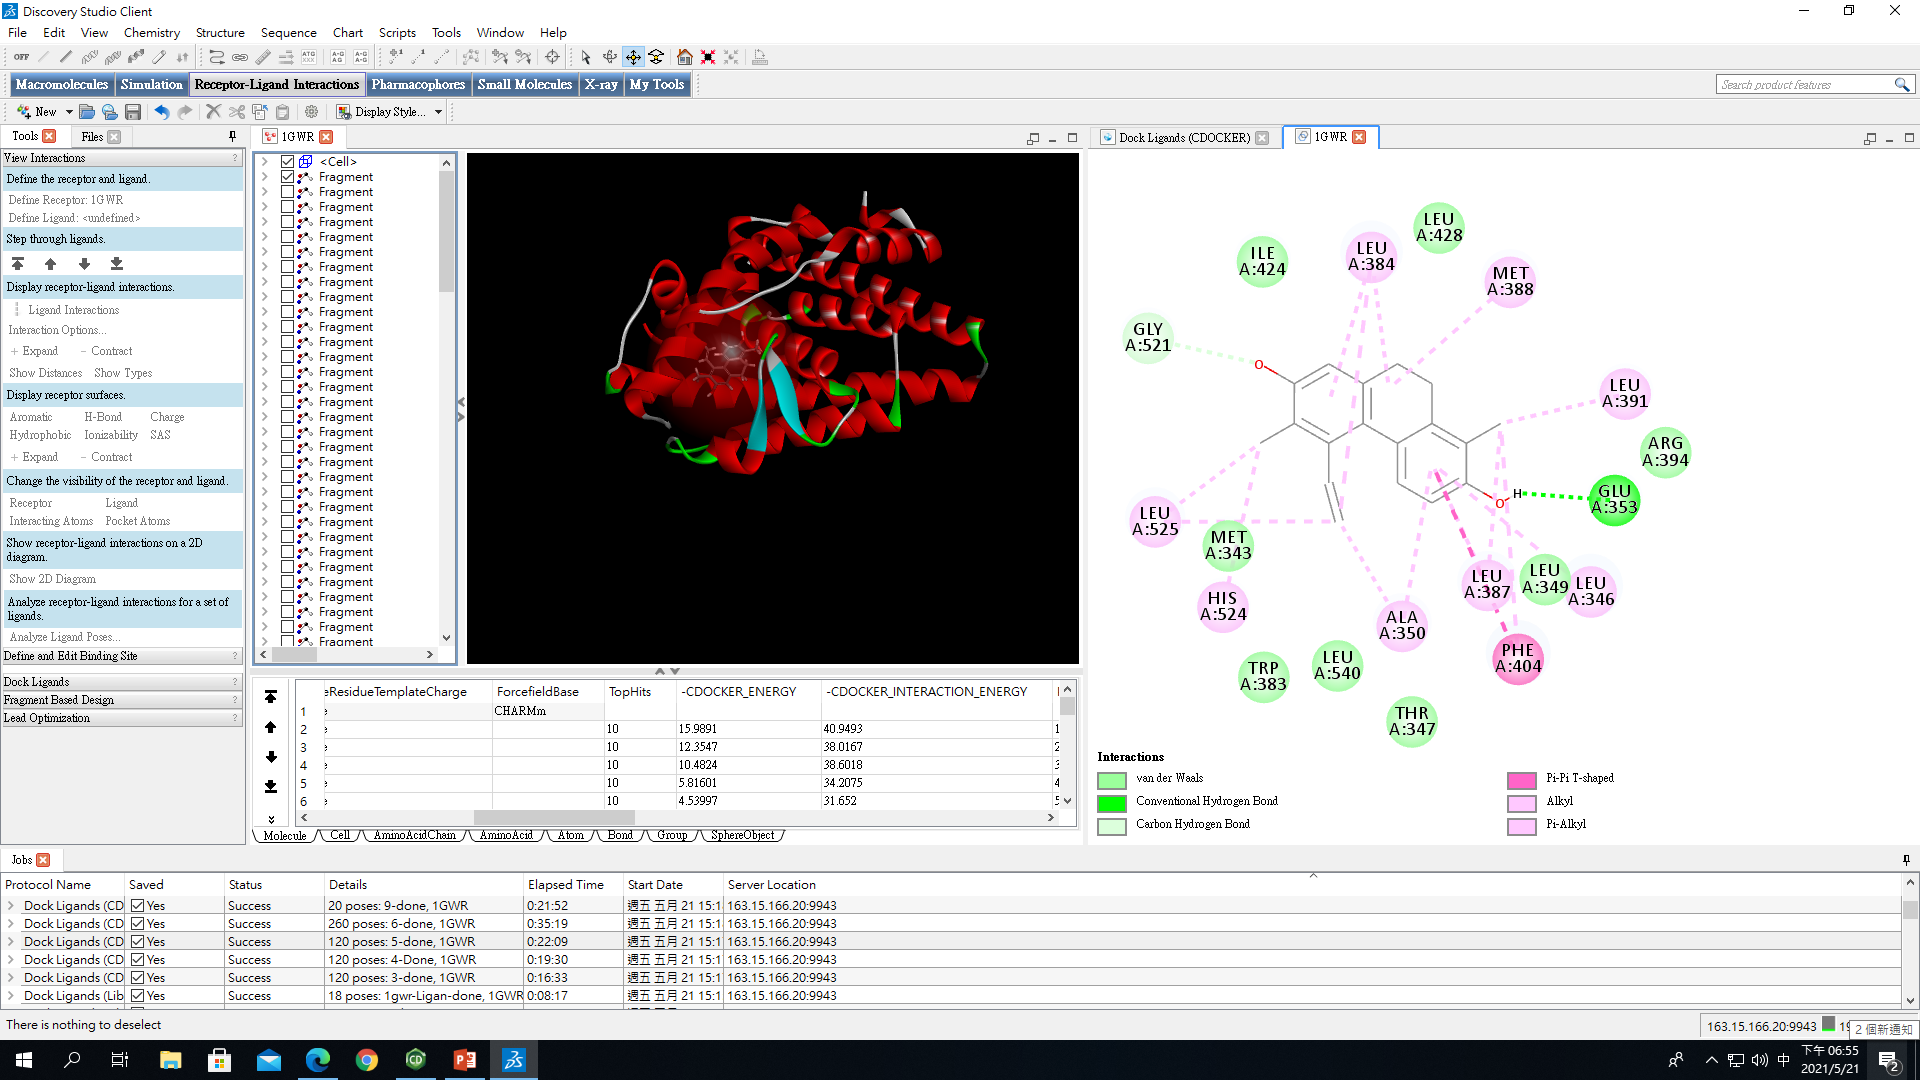 |
| **6** | 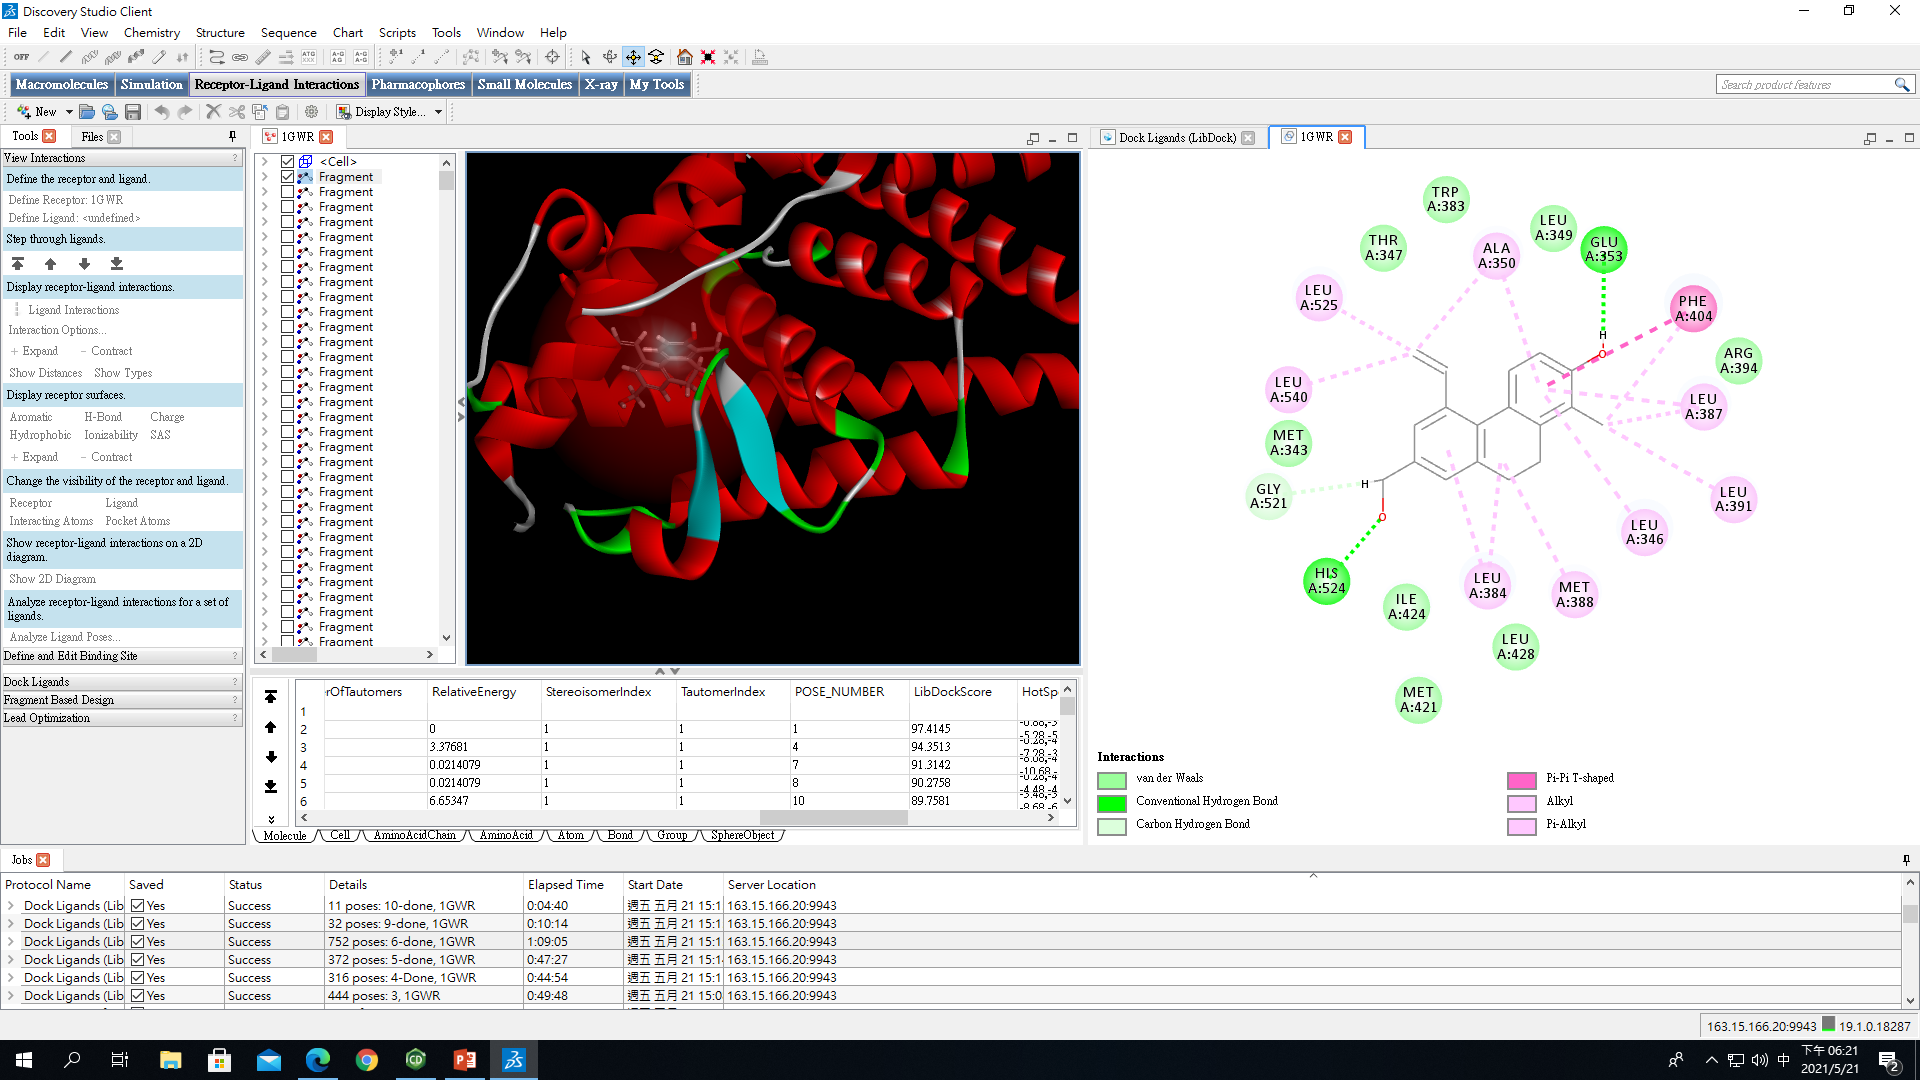 | 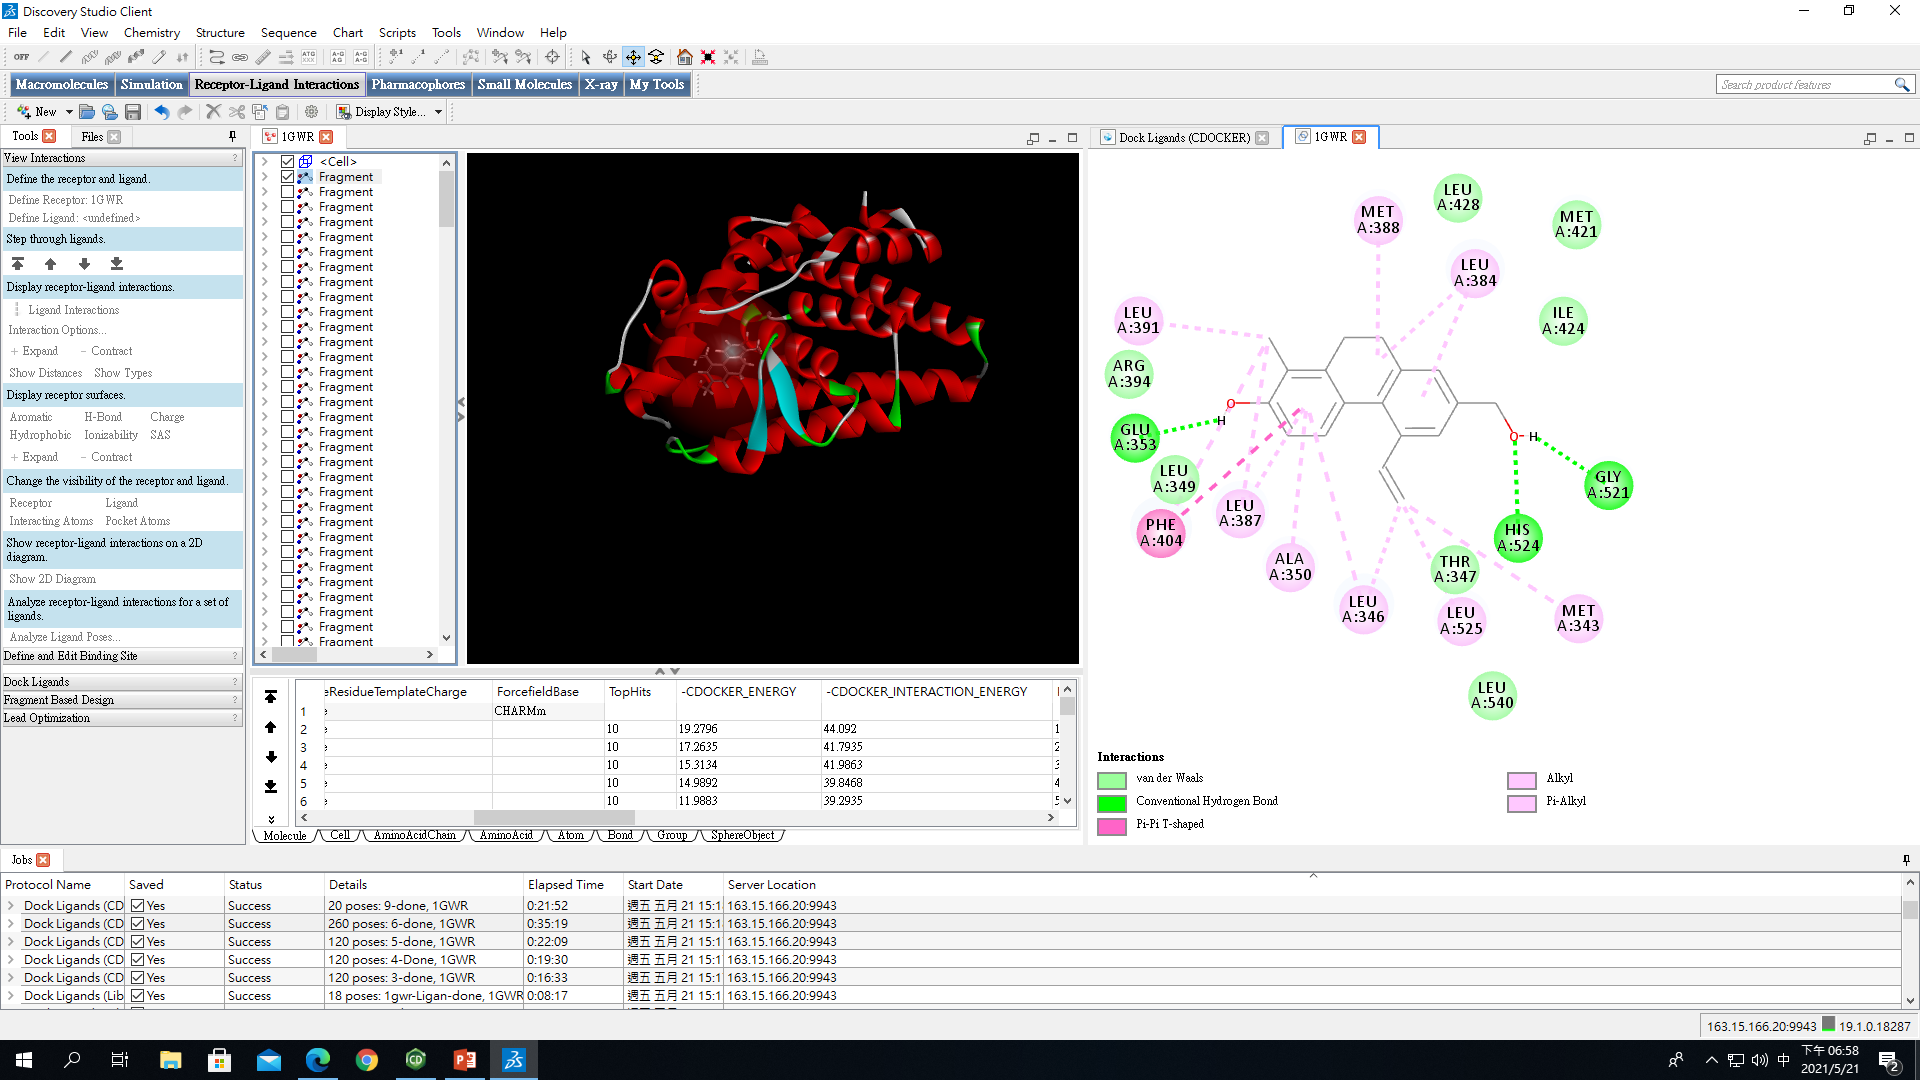 |
| **9** | 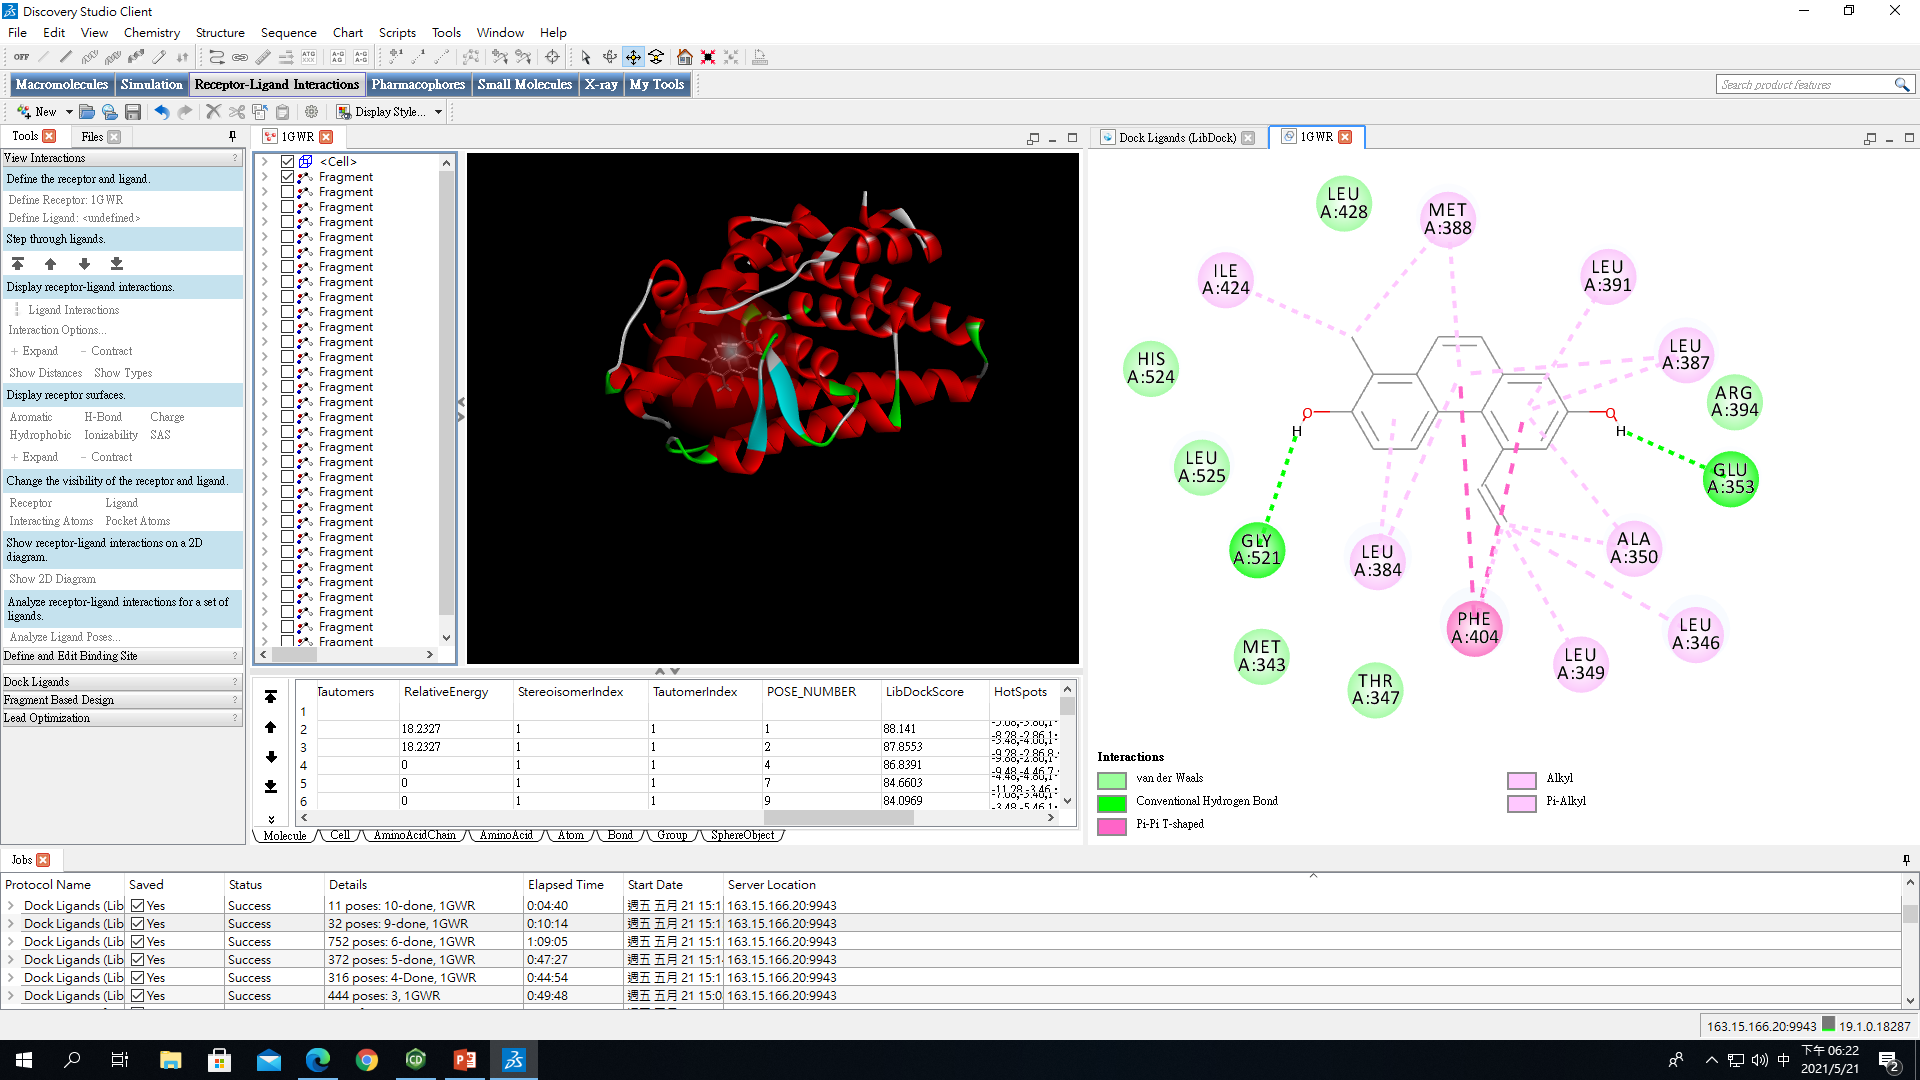 | 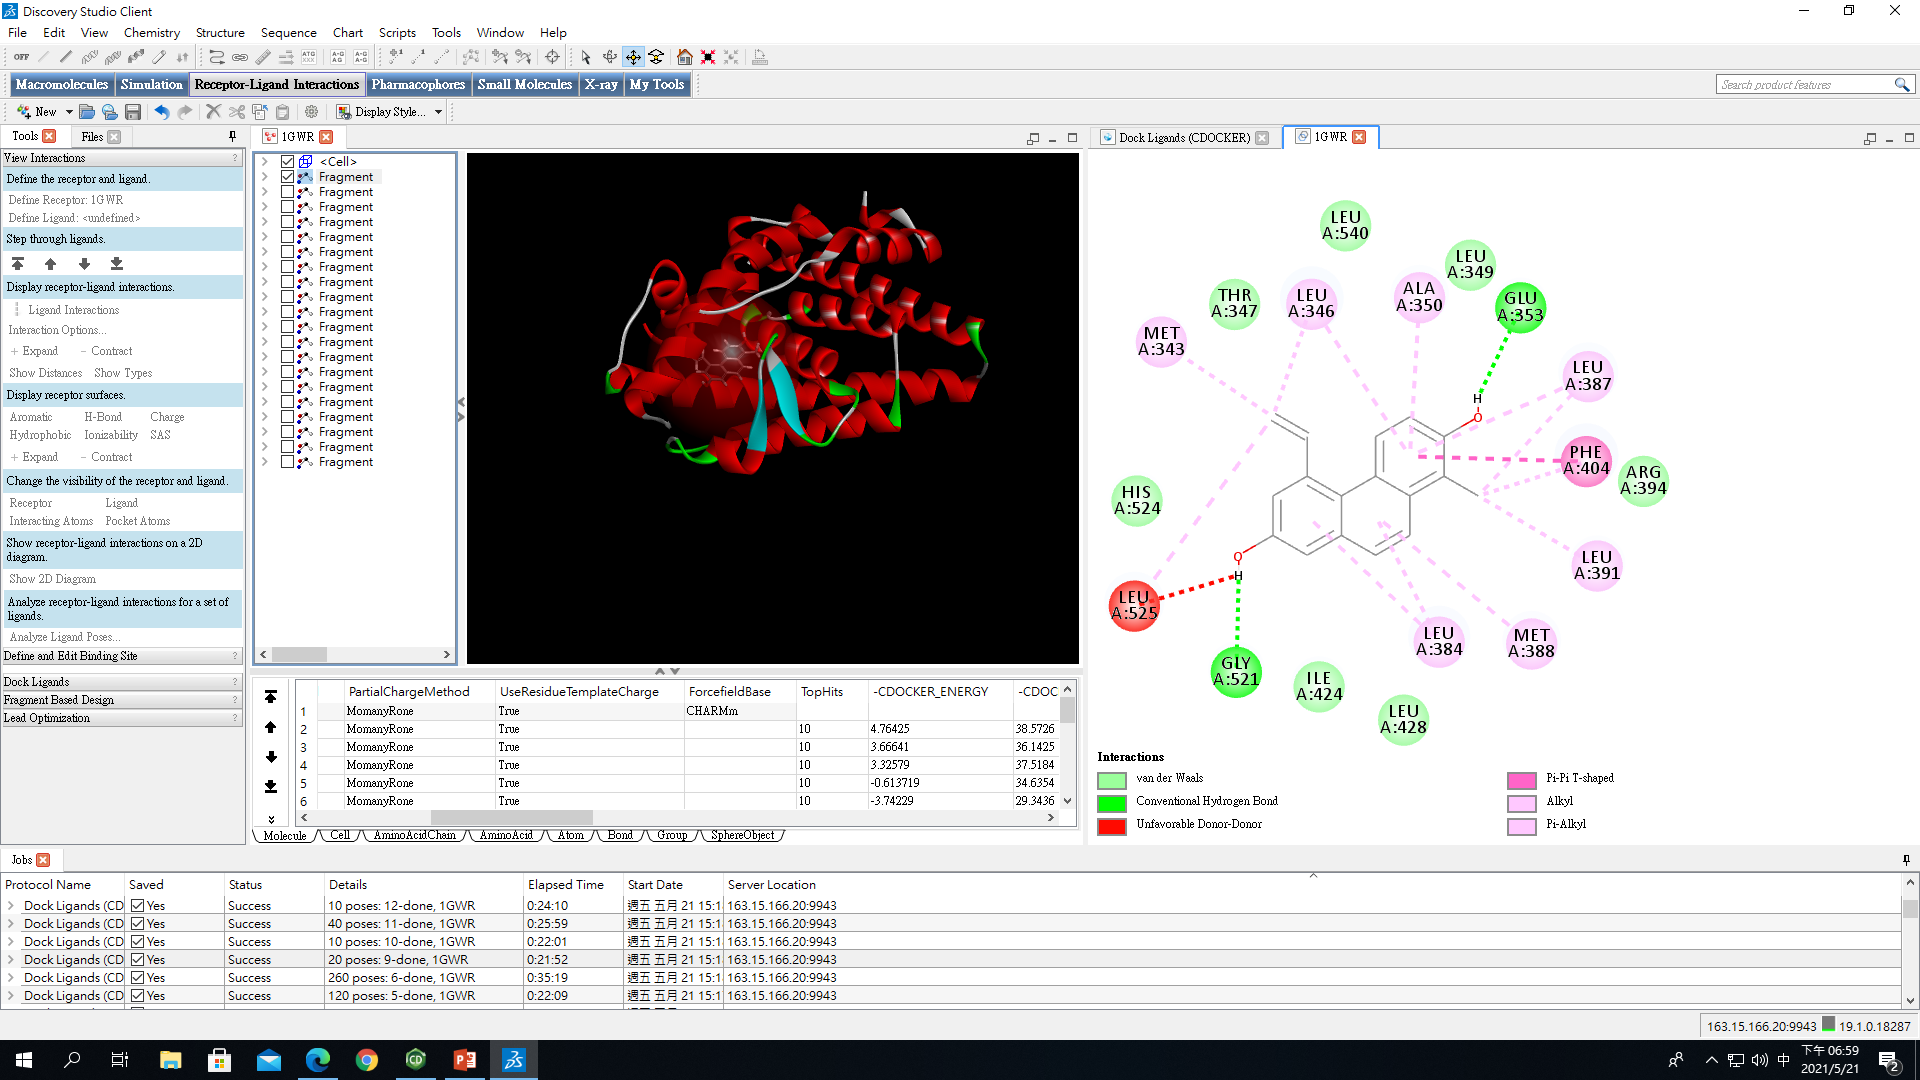 |
| **10** | 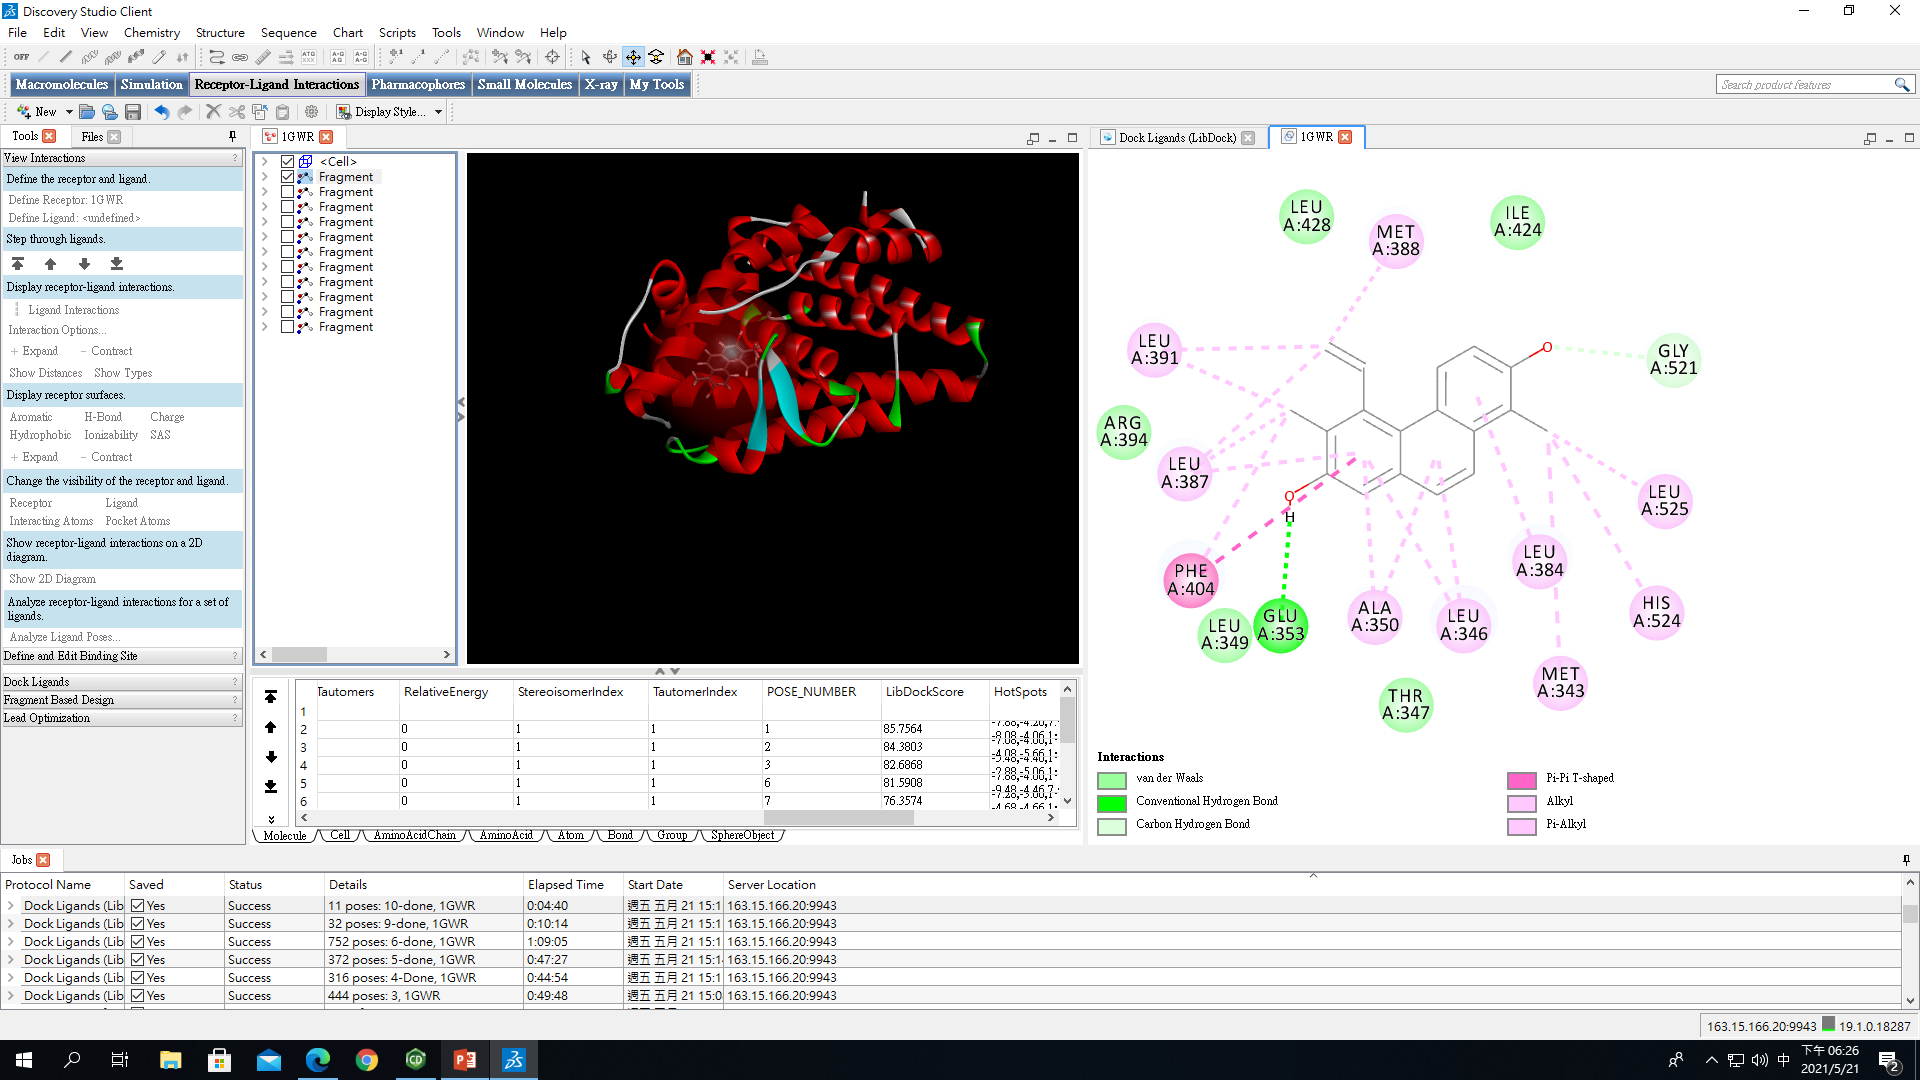 | 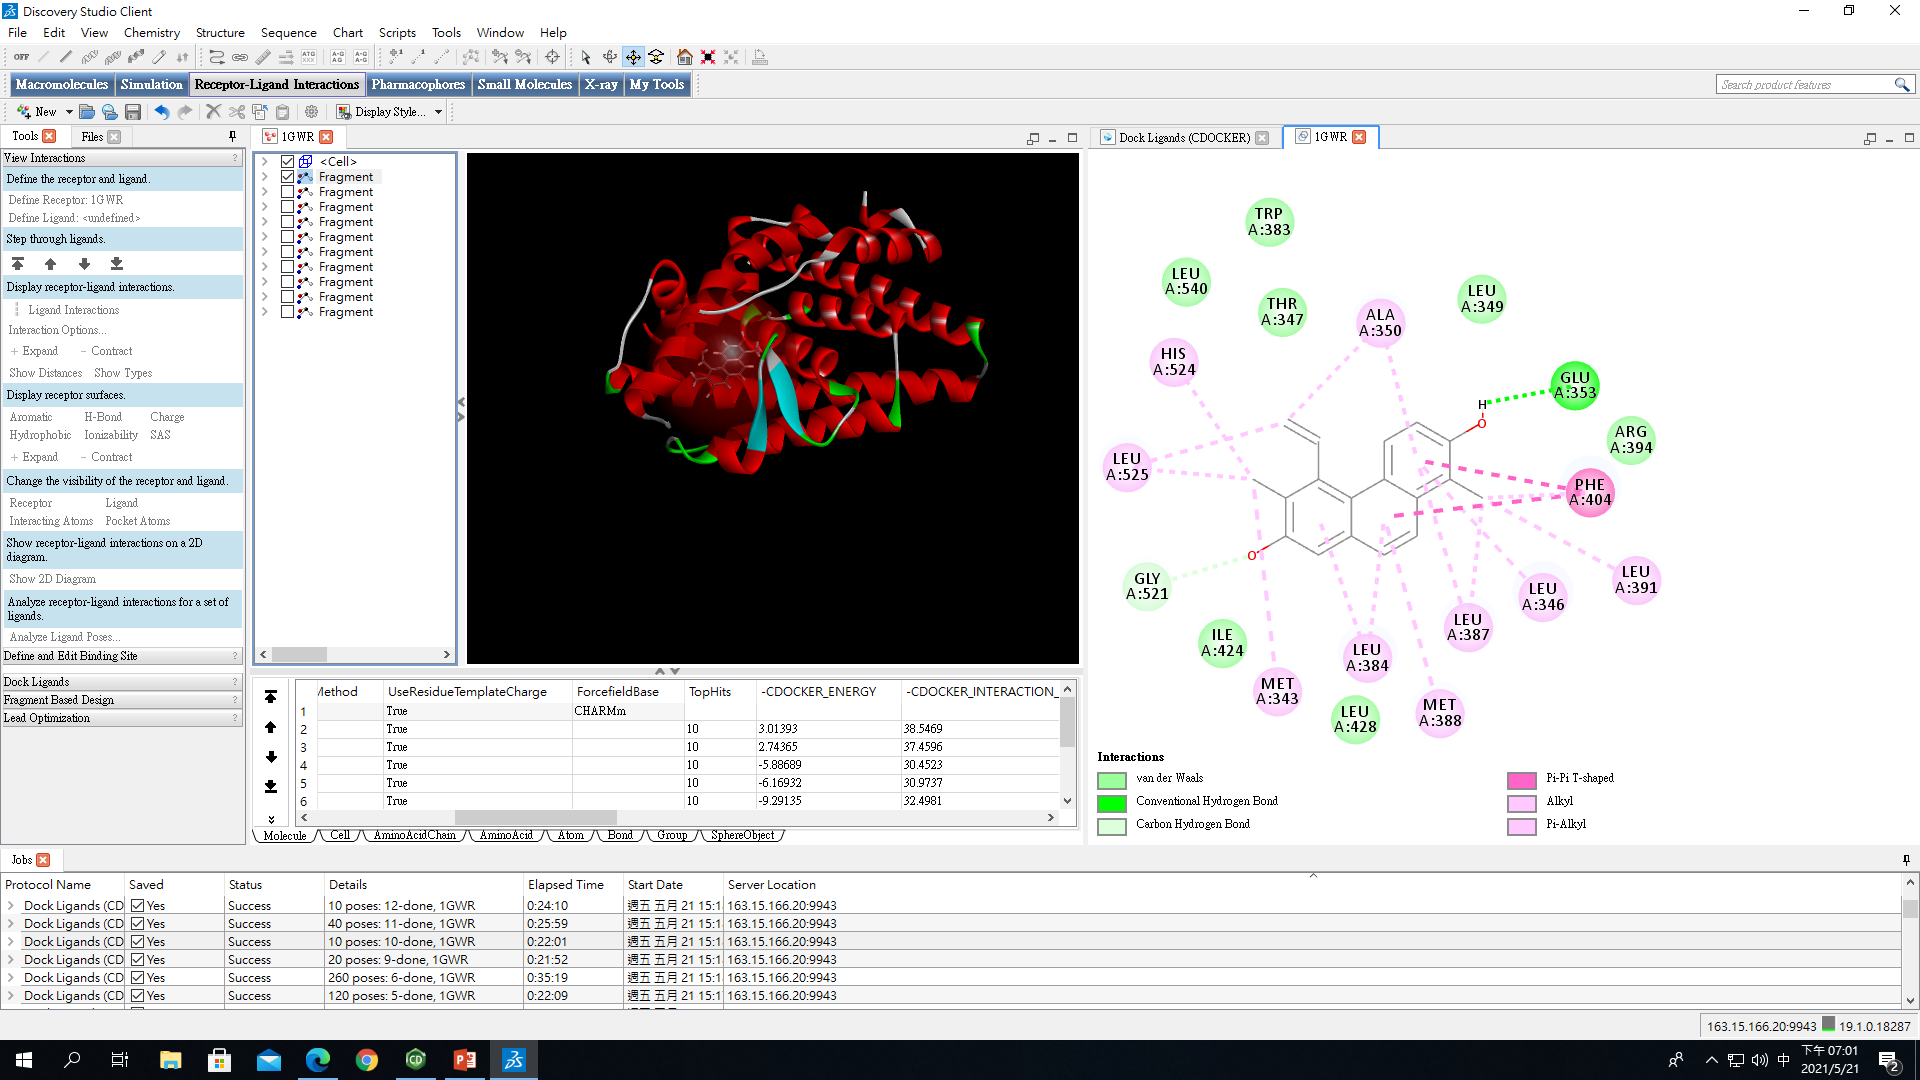 |
| **11** | 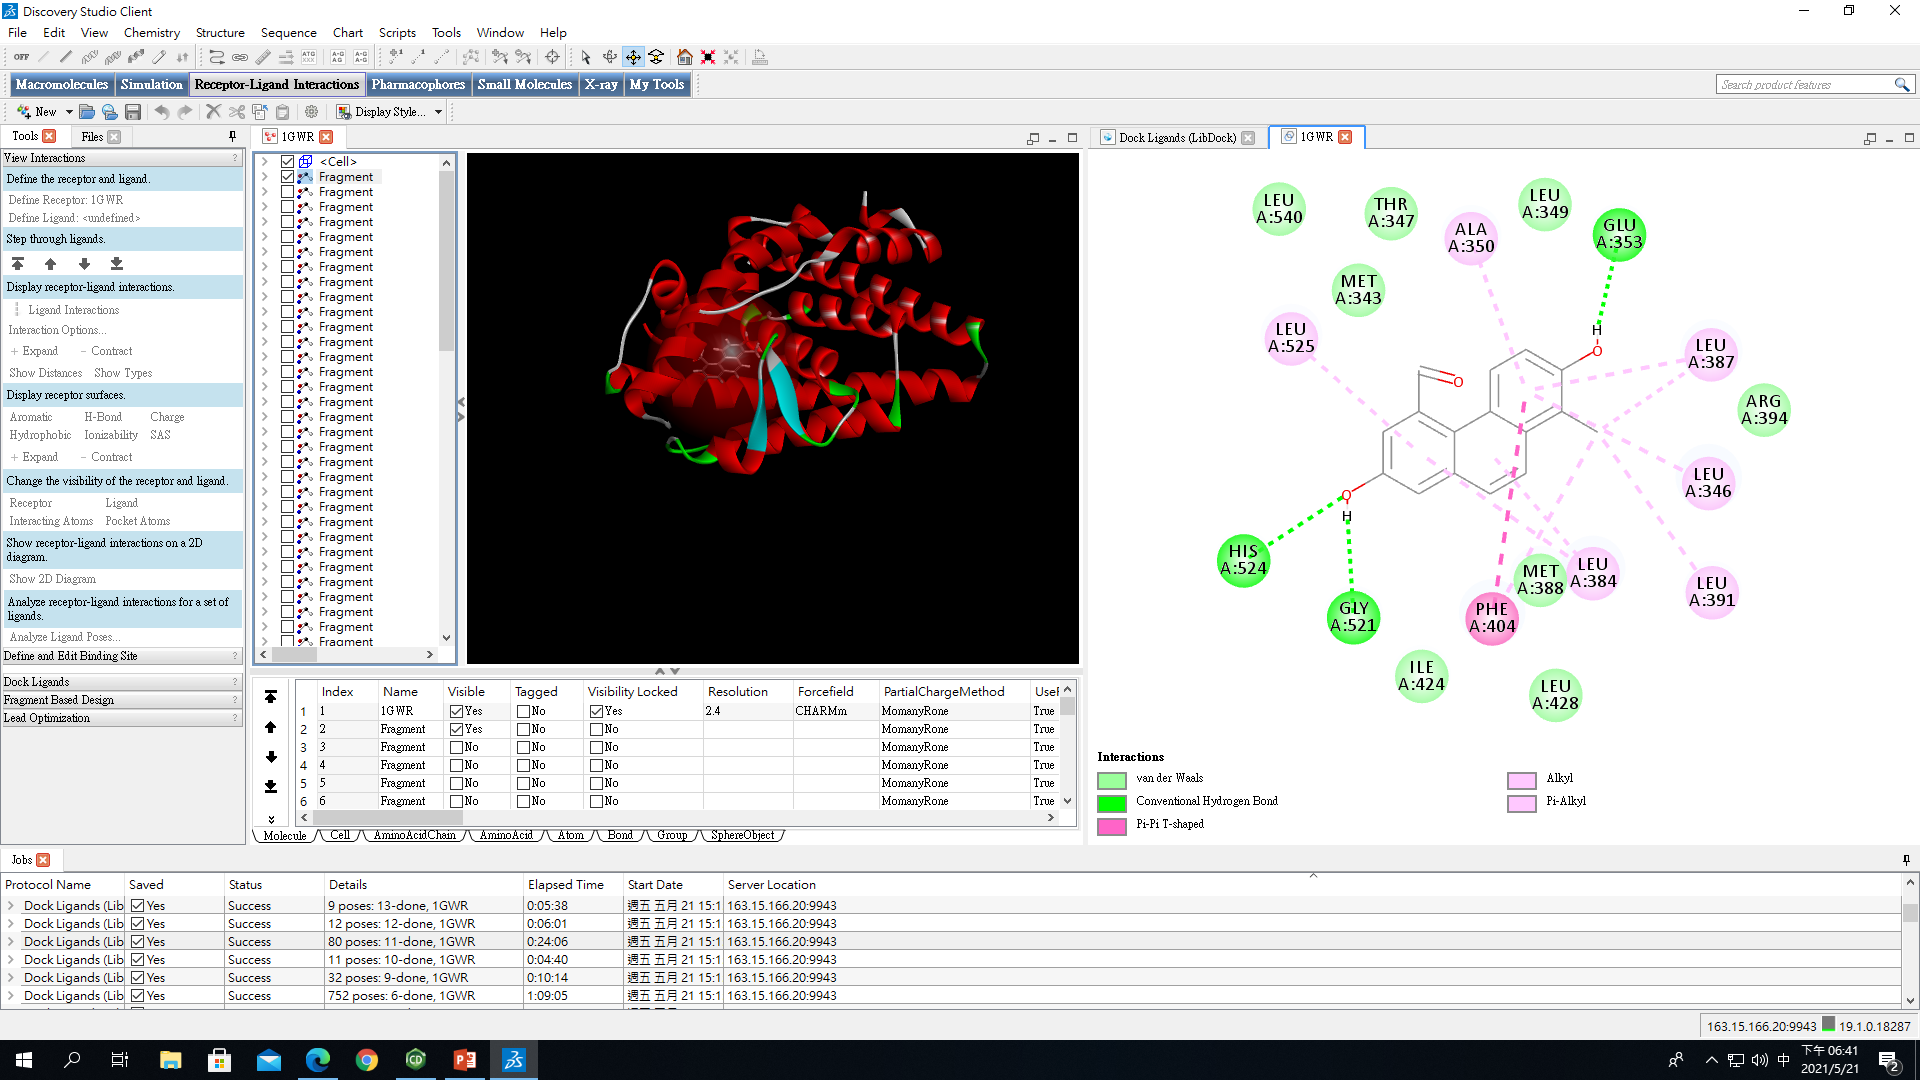 | 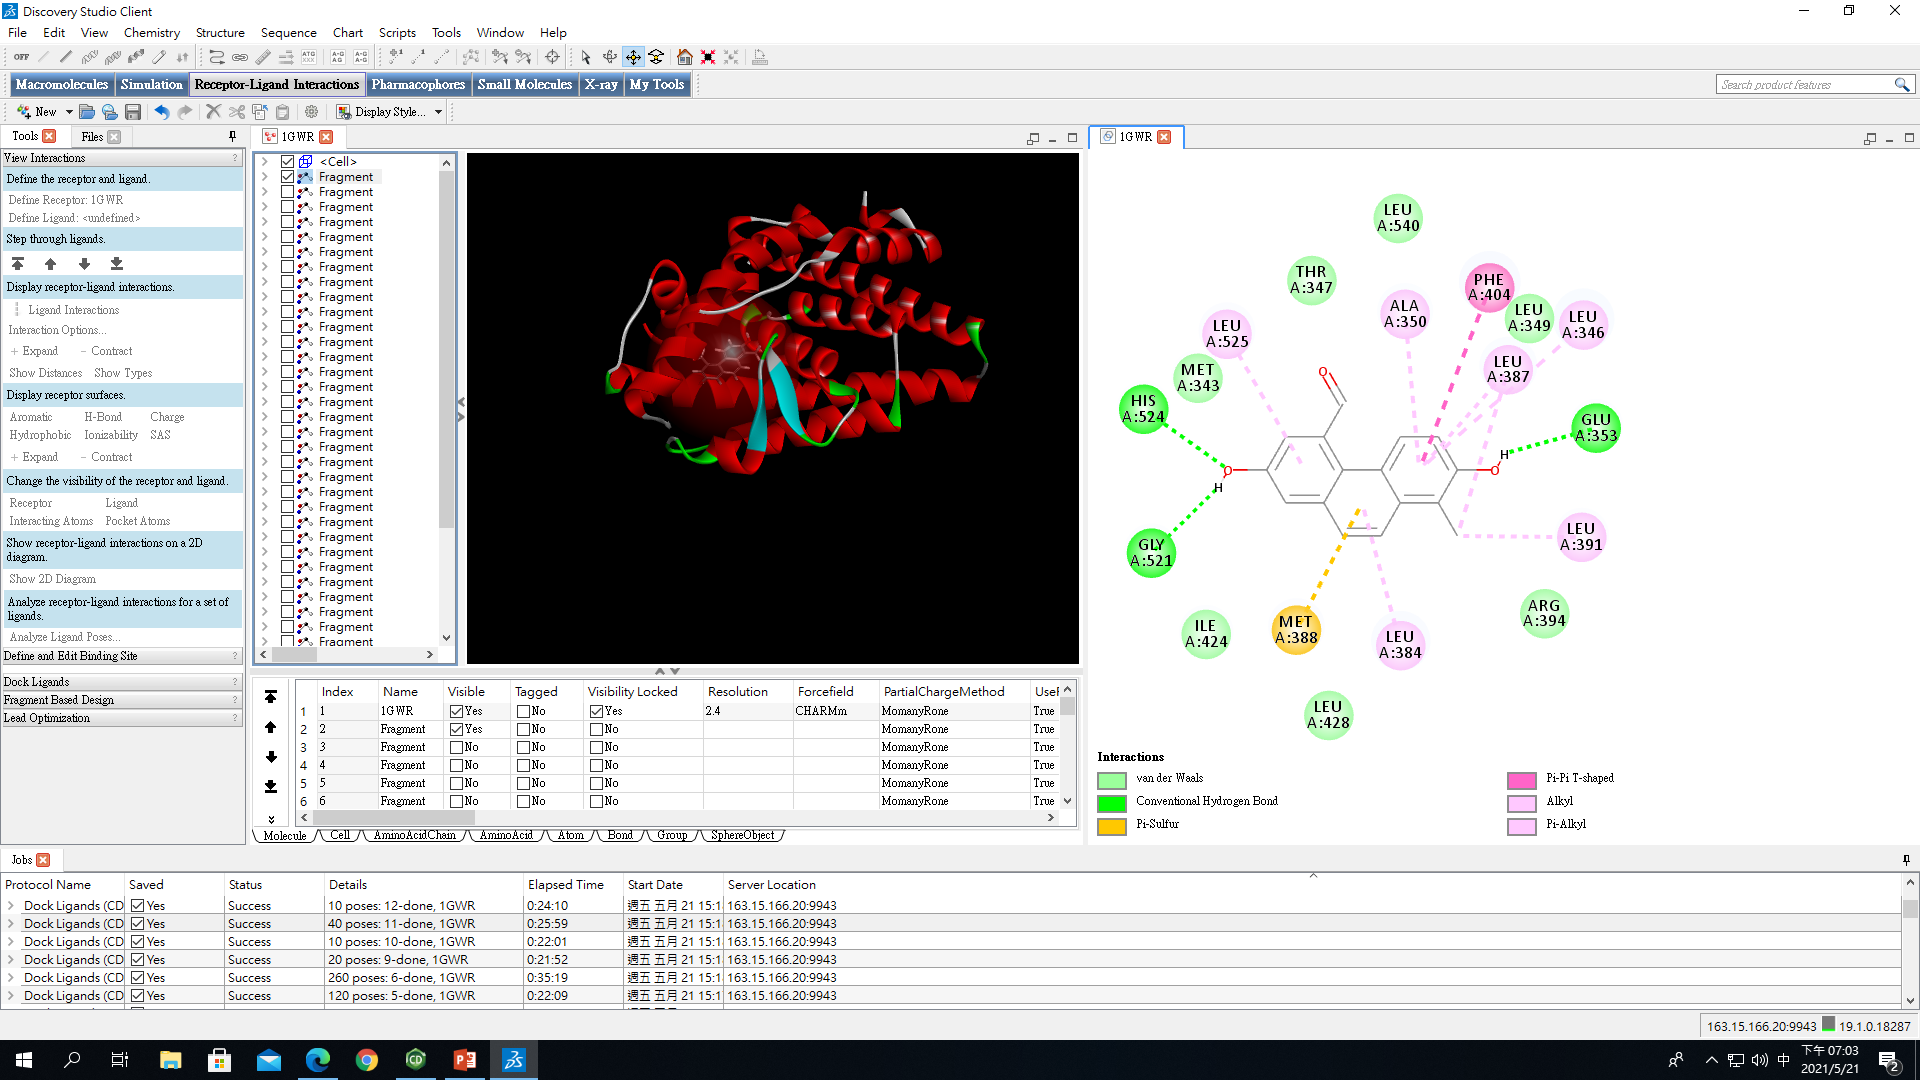 |
| **12** | 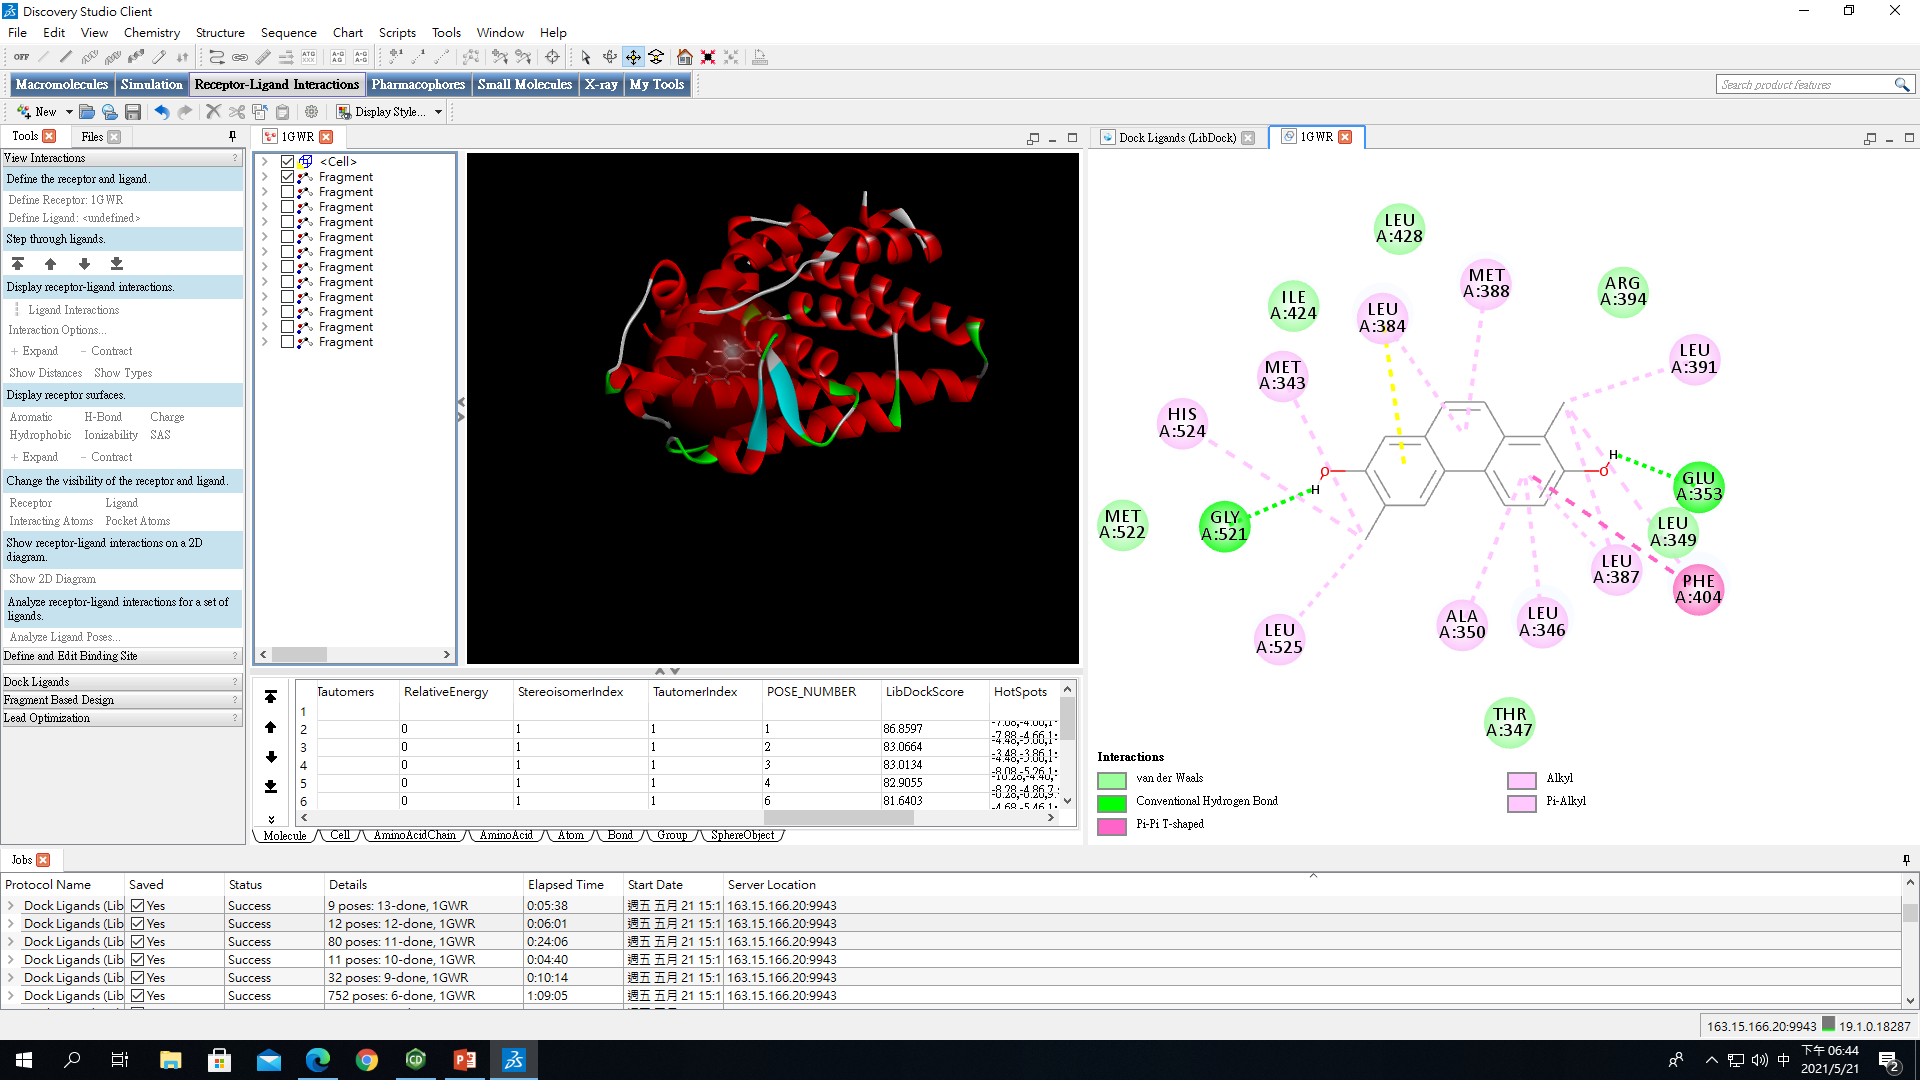 | 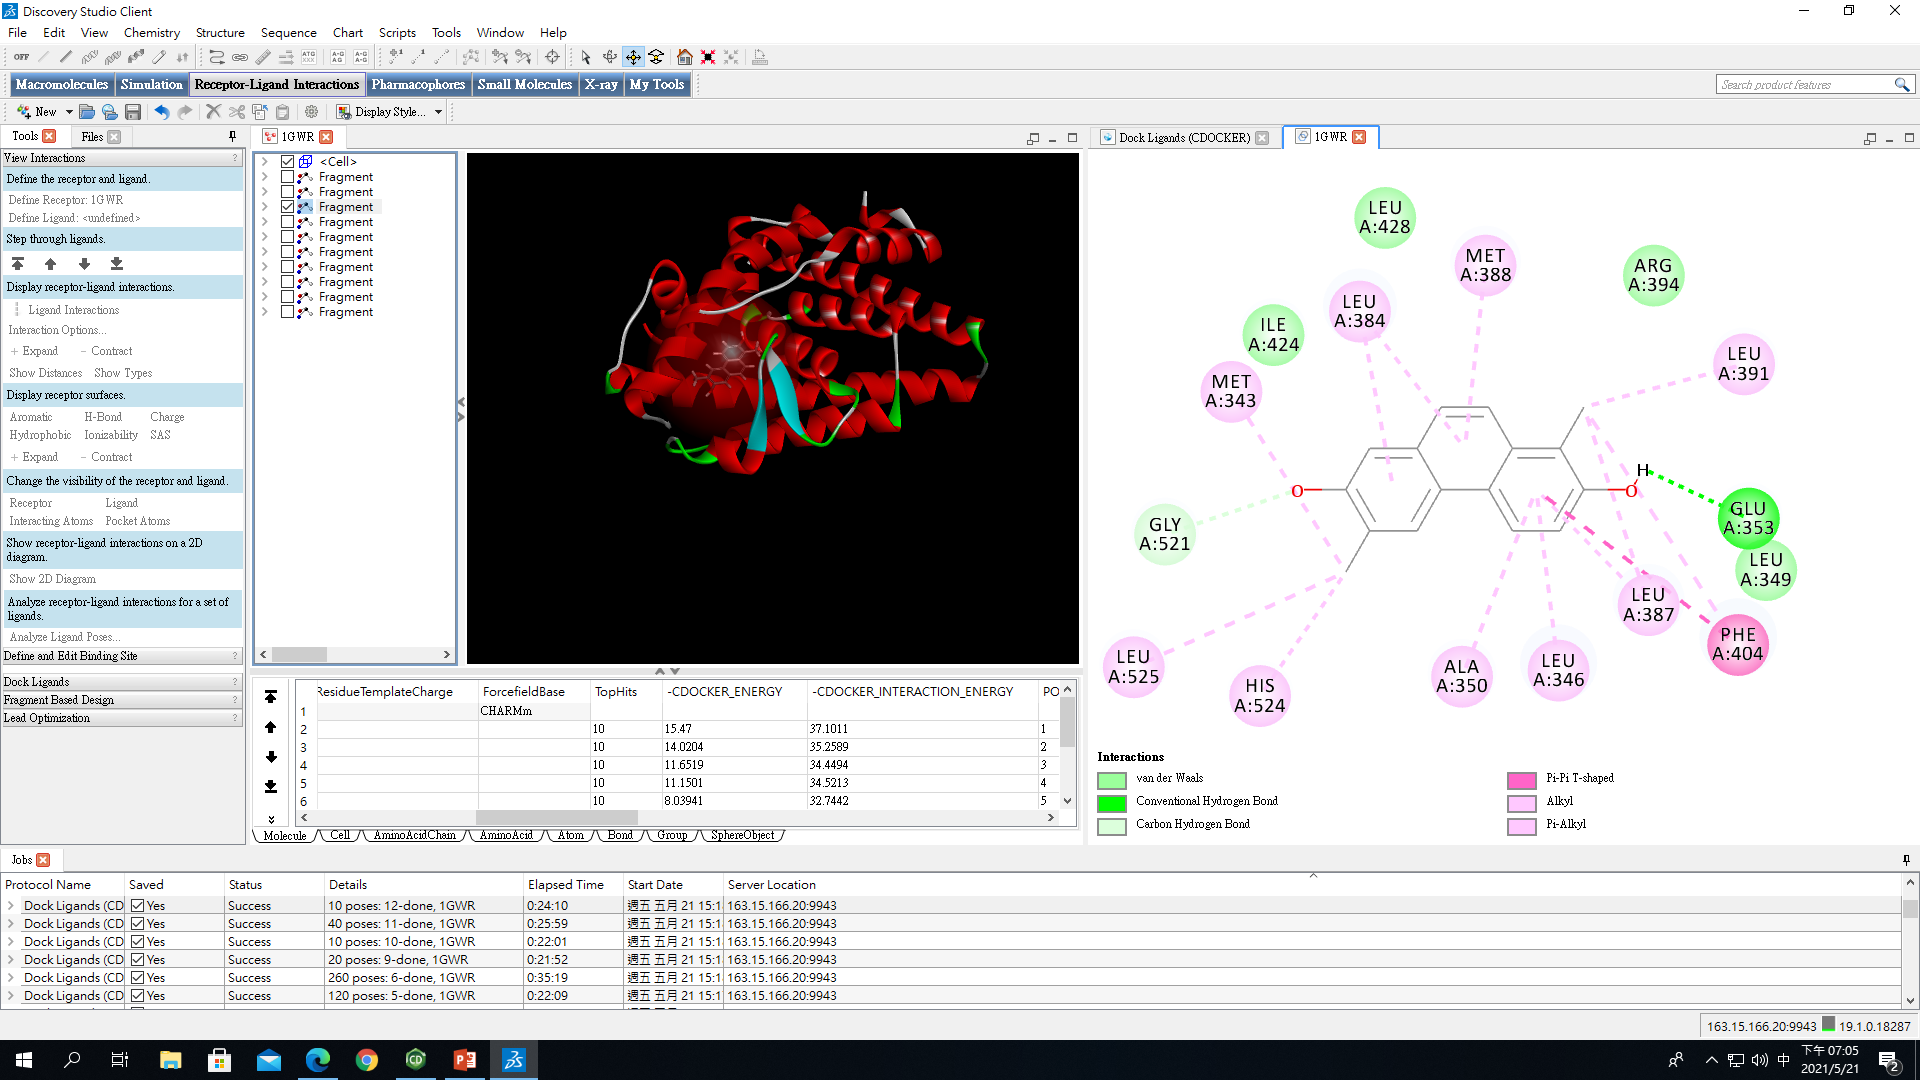 |
| **13** | 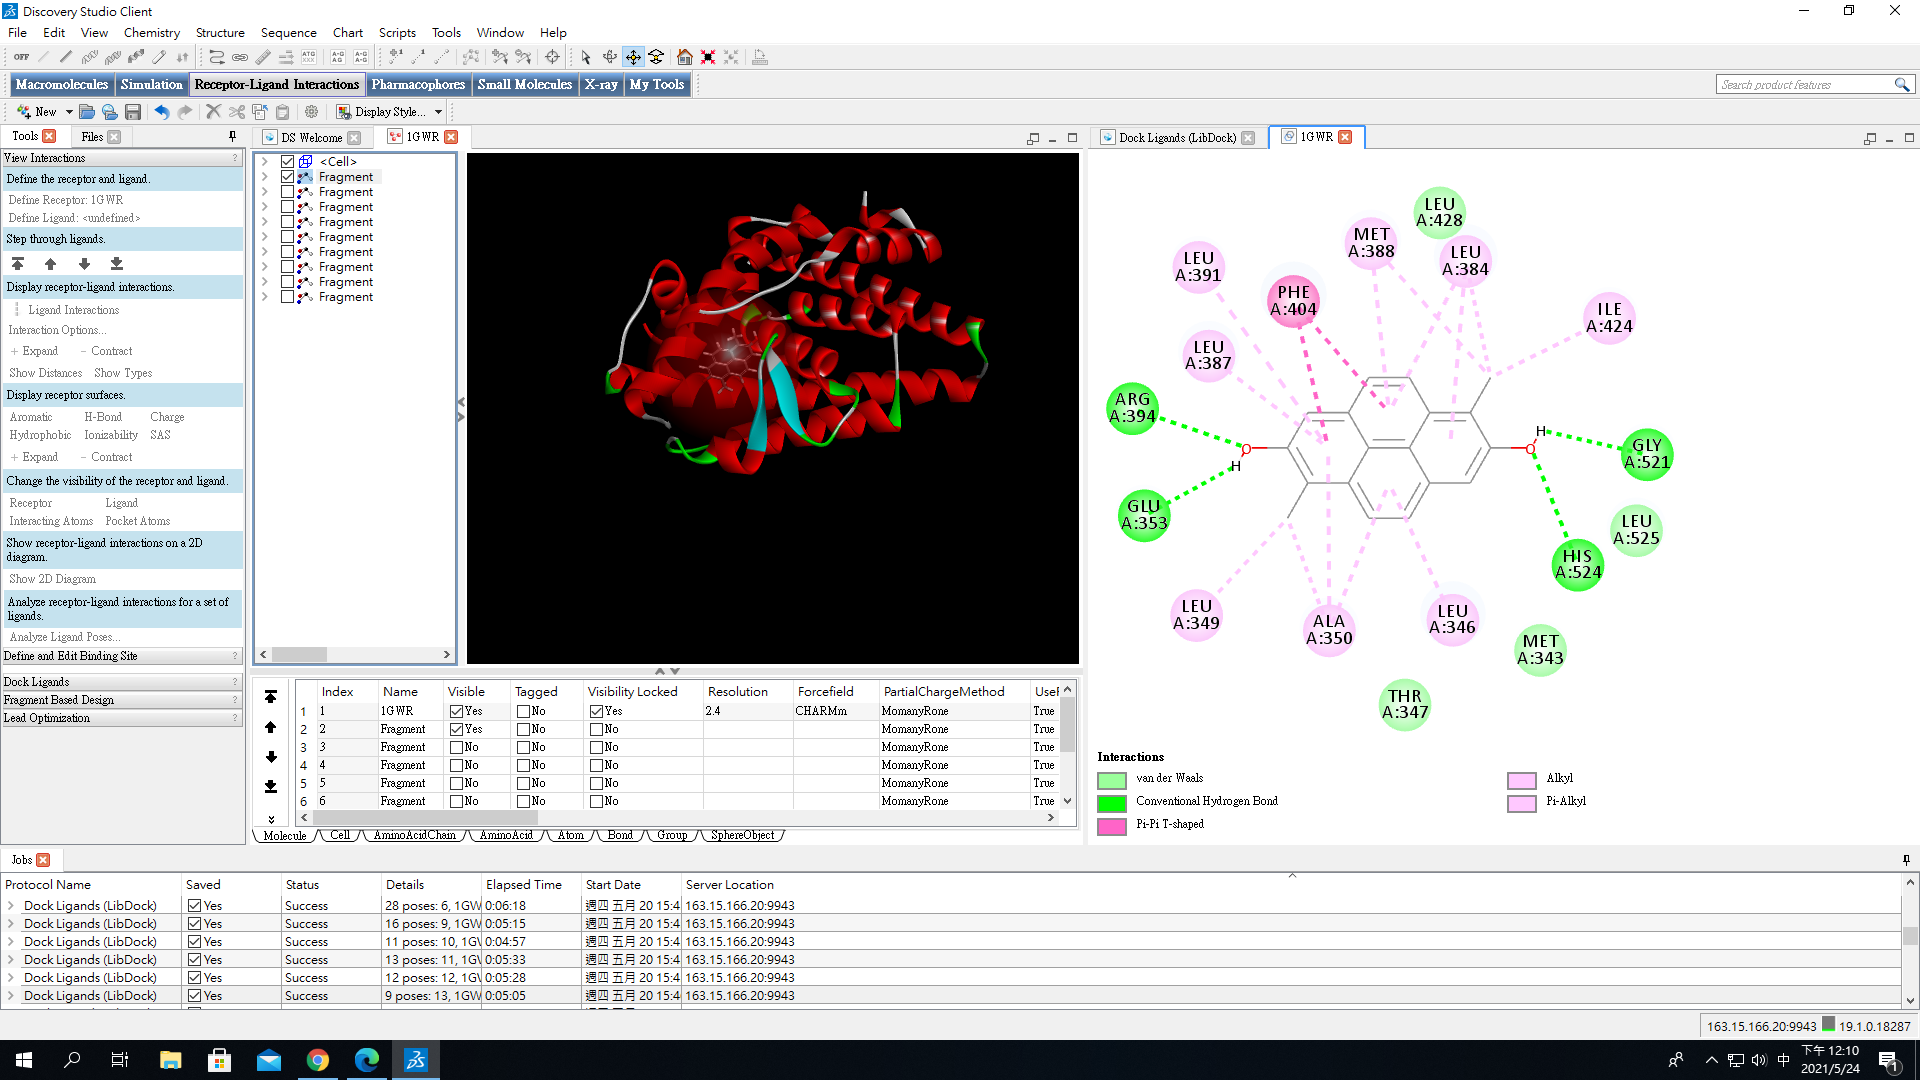 | 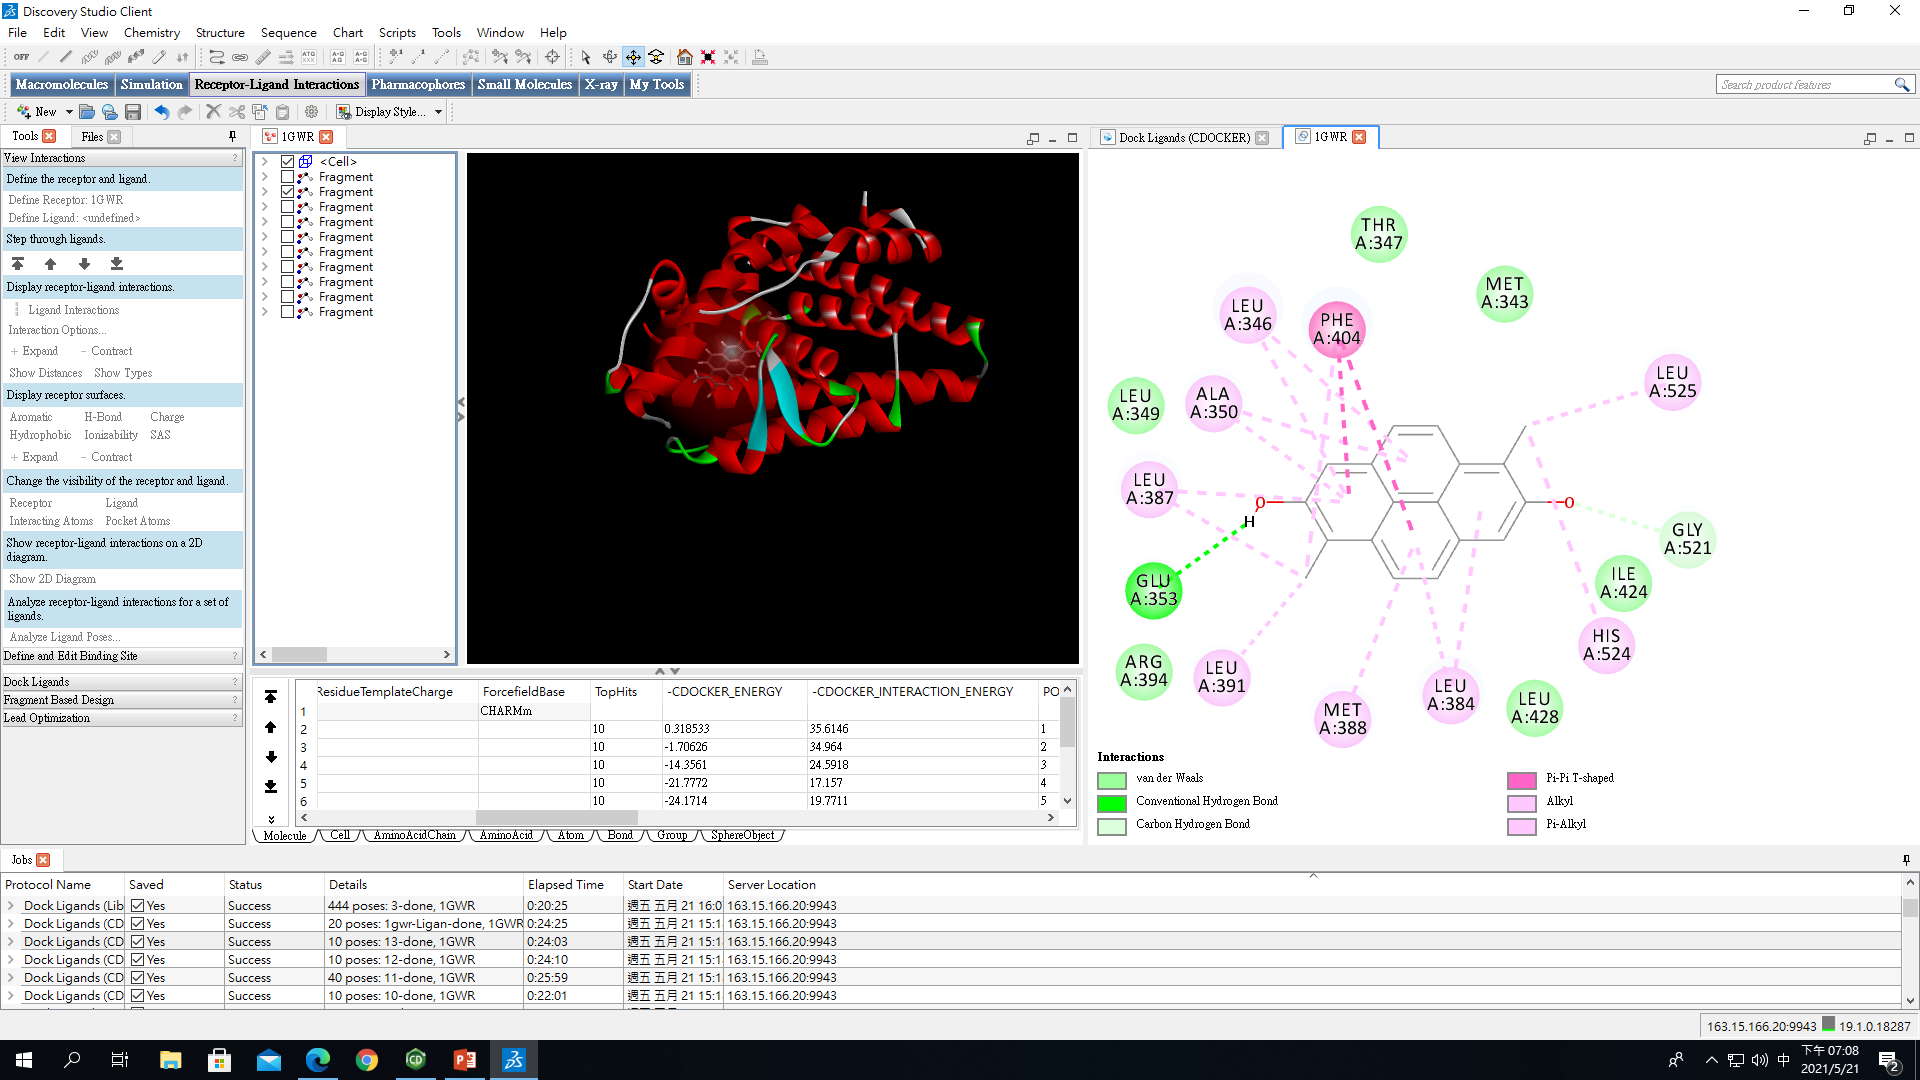 |
